# Supplementary material
Source: PubMed Central journal article supplement (PMC6842607)
Supplement: pnas.1903765116.sapp.pdf [file pnas.1903765116.sapp.pdf]

## Supplementary Information for

DNA methyltransferase inhibitors induce a BRCAness phenotype that sensitizes NSCLC to PARP inhibitor and ionizing radiation

Rachel Abbotts, Michael J. Topper, Christopher Biondi, Daniel Fontaine, Reena Goswami, Lora Stojanovic, Eun Yong Choi, Lena McLaughlin, Aksinjia A. Shamah, Limin Xia, Rena Lapidus, Javed Mahmood, Stephen B. Baylin\*, Feyruz V. Rassool\*

\*Stephen B. Baylin

Email: [sbaylin@jhmi.edu](mailto:sbaylin@jhmi.edu)

\*Feyruz V. Rassool

Email: [frassool@som.umaryland.edu](mailto:frassool@som.umaryland.edu)

### **This PDF file includes:**

Supplementary experimental procedures Tables S1 to S2

Supplementary experimental procedures

Supplementary figures: Figs. S1 to S19

Supplementary tables: Tables S1 to S2

## Supplementary Experimental Procedures

### Materials

|                                         | Company         | Cat. #      | Dilution |
|-----------------------------------------|-----------------|-------------|----------|
| <b>Immunoblotting</b>                   |                 |             |          |
| FANCD2 (F117)                           | Santa Cruz      | sc-20022    | 1:200    |
| Ku80 (Ku86 B-1)                         | Santa Cruz      | sc-5280     | 1:200    |
| Ku80 (111)                              | Thermo Fisher   | MA5-12933   | 1:200    |
| $\beta$ -actin                          | Millipore Sigma | A1978       | 1:5000   |
| <b>Immunofluorescence</b>               |                 |             |          |
| RAD51                                   | Abcam           | ab63801     | 1:1000   |
| $\gamma$ H2AX (Ser139, clone JBW301)    | Millipore Sigma | 05-636      | 1:100    |
| Goat anti-rabbit IgG (H+L), DyLight 488 | Seracare KPL    | 5230-0385   | 1:100    |
| Goat anti-mouse IgG (H+L), DyLight 594  | Invitrogen      | 35511       | 1:200    |
| <b>Proximity ligation assay</b>         |                 |             |          |
| PARP1 (3G4)                             | Millipore Sigma | WH0000142M1 | 1:200    |
| $\gamma$ H2AX (Ser139, clone 20E3)      | Cell Signaling  | CST-9718    | 1:200    |
| DNMT1 (H-300)                           | Santa Cruz      | sc-20701    | 1:200    |
| <b>DNA fiber</b>                        |                 |             |          |
| Anti-BrdU (B44): IdU                    | BD Biosciences  | 347580      | 1:40     |
| Anti-BrdU (BU1/75 ICR1): CldU           | Abcam           | ab6326      | 1:200    |
| Sheep anti-mouse IgG Cy3                | Millipore Sigma | C2181       | 1:500    |
| Goat anti-rat IgG Alexa Fluor 488       | Thermo Fisher   | A11006      | 1:200    |

**Table S1.** Antibodies used during experimental procedures.



| Gene     | Company | Cat. #            | Forward sequence                 | Reverse sequence                 |
|----------|---------|-------------------|----------------------------------|----------------------------------|
| ATM      | Qiagen  | Hs_ATM_1_SG       |                                  |                                  |
| ATR      | Qiagen  | Hs_ATR_2_SG       |                                  |                                  |
| BRCA1    | Qiagen  | Hs_BRCA1_vb.1_SG  |                                  |                                  |
| BRCA2    | Qiagen  | Hs_BRCA2_1_SG     |                                  |                                  |
| FANCC    | IDT     |                   | 5'-TGG AGG CTC TCC TCA TCT GT    | 5'-GCA TTC GAT CCT TCT CAG ACA   |
| FANCD2   | Qiagen  | Hs_FANCD2_va.1_SG |                                  |                                  |
| FANCE    | IDT     |                   | 5'-ATG AGA AGG AGA GAC CCG AA    | 5'-GAA GTC AAG GAG AGG ATC CG    |
| FANCF    | Qiagen  | Hs_FANCF_1_SG     |                                  |                                  |
| FANCG    | Qiagen  | Hs_FANCG_1_SG     |                                  |                                  |
| Ku70     | Qiagen  | Hs_XRCC6_1_SG     |                                  |                                  |
| Ku80     | Qiagen  | Hs_XRCC5_1_SG     |                                  |                                  |
| RAD50    | Qiagen  | Hs_RAD50_1_SG     |                                  |                                  |
| XRCC4    | Qiagen  | Hs_XRCC4_1_SG     |                                  |                                  |
| B2M      | Qiagen  | Hs_B2M_1_SG       |                                  |                                  |
| Actin    | Qiagen  | Hs_ACTB_1_SG      |                                  |                                  |
| GAPDH    | IDT     |                   | 5'-GTC TCC TCT GAC TTC AAC AGC G | 5'-ACC ACC CTG TTG CTG TAG CCA A |
| MYC      | Qiagen  | Hs_MYC_1_SG       |                                  |                                  |
| IFI27    |         |                   | 5'-ATC AGC AGT GAC CAG TGT GG    | 5'-TGG CCA CAA CTC CTC CAA TC    |
| OASL     |         |                   | 5'-TCG TGA AAC ATC GGC CAA CT    | 5'-TCG TGA AAC ATC GGC CAA CT    |
| EJ5      | IDT     |                   | 5'-CTG CTA ACC ATG TTC ATG CC    | 5'-AAG TCG TGC TGC TTC ATG TG    |
| EJ5-Ctrl | IDT     |                   | 5'-GTG CGC GGA ACC CCT ATT TG    | 5'-AGG GAA TAA GGG CGA CAC GG    |

**Table S2.** Quantitative real time PCR primers used during experimental procedures. All Qiagen primers are QuantiTect Primer Assays. IDT = Integrated DNA Technologies.

## Supplementary Experimental Procedures

### *Immunoblotting*

Cells were lysed in RIPA buffer (Sigma-Aldrich) containing Halt protease and phosphatase inhibitors (ThermoFisher) for 1h at 4°C, then cleared by centrifugation at 13000rpm for 20min. Proteins were boiled for 5min in 1X lithium dodecyl sulphate buffer containing 0.1M dithiothreitol (DTT), loaded on 4-15% SDS-PAGE gels (BioRad), and transferred onto PVDF membrane (GE Life Sciences). Membranes were blocked in 5% non-fat milk in tris buffered saline-0.1% Tween 20 (TBST) for 1 hr. Primary antibodies were applied overnight at 4°C. Membranes were washed 3 times in TBST and secondary antibodies applied for 1 hr. Following 3 washes in TBST, chemiluminescent detection of HRP was performed using Hi/Lo Digital-ECL Western Blot Detection Kit acquired on a KwikQuant imager (both KindleBio).

For immunoblotting of proteins extracted from xenograft tissue, frozen samples were ground using a mortar and pestle, and resuspended in lysis buffer (NaCl 150 mM, Tris-HCl pH 7.5 10 mM, EDTA 1 mM, NP-40 1%, EGTA 1 mM, sodium fluoride 50 mM,  $\beta$ -glycerophosphate 40 mM, sodium pyrophosphate 10 mM, sodium vanadate 1 mM, PMSF 8mM, 1x Halt phosphatase inhibitor). Homogenized samples were sonicated for 1min, incubated for 1h at 4C with agitation, and then cleared by centrifugation at 13000rpm for 30min. Subsequent processing proceeded as described above.

### *Immunofluorescence*

NSCLC cell lines were cultured for 6 days in the presence of 5-azacytidine and/or talazoparib (or vehicle), then replated onto sterile coverslips. On day 7, cells were irradiated with a single 2 Gy fraction. After recovery for 2-48hr (time-course experiments) or 4hr (single time point experiments), cells were fixed for 10 min in 4% paraformaldehyde, washed 3 times in Dulbecco's phosphate-buffered saline (DPBS), and permeabilized for 10 min in permeabilization solution (50 mM NaCl, 3 mM MgCl<sub>2</sub>, 10 mM HEPES, 200 nM sucrose, and 0.5% Triton X-100 in 1X PBS). Coverslips were washed 3 times in DPBS + 1% bovine serum albumin + 0.1% Triton X-100, blocked in DPBS + 10% FBS for 1h at room temperature, washed 3 times, and incubated overnight in primary antibody at 4°C. Coverslips were washed and incubated in secondary antibody for 1h at 37°C. After washing, coverslips were mounted on slides using ProLong Gold Antifade Reagent with DAPI (Cell Signaling Technology). Foci were examined using a Nikon fluorescent microscope Eclipse 80i (100×/1.4 oil, Melville, NY). Images of at least 50 cells/slide were captured using a CCD (charge-coupled device) camera and the imaging software NIS Elements (BR 3.00, Nikon).

### *Proximity ligation assay (PLA)*

NSCLC cell lines were cultured for 3 days in the presence of 5-azacytidine (500 nM) and/or talazoparib (2nM or 100nM), then replated onto sterile coverslips. On day 4, cells were treated with 500  $\mu$ M methyl methanesulphonate to induce DNA base damage. After 4hr,

cells were fixed for 10 min in 4% paraformaldehyde, based 3 times in DPBS, and permeabilized for 15 min in 0.1% triton x-100 in PBS. Coverslips were washed 3 times in DPBS, blocked for 1hr at 37°C in Duolink In Situ PLA Blocking Solution (Sigma-Aldrich), and incubated overnight at 4°C in primary antibodies (mouse anti-PARP1/rabbit anti-H2AX, mouse anti-PARP1/rabbit anti  $\gamma$ H2AX, mouse anti-PARP1/rabbit anti-DNMT1; all at 1:200 dilution in Duolink In Situ PLA Antibody Diluent). Following two washes in Duolink In Situ Wash Buffer A (also used for subsequent washes), coverslips were incubated for 1 hr in Duolink In Situ PLA Probes (PLUS anti-rabbit and MINUS anti-mouse, 1:5 in antibody diluent) at 37°C in a humidified chamber, then washed twice. Ligase was prepared 1:40 in Duolink Ligation buffer and incubated on coverslips for 1h at 37°C in a humidified chamber, then washed twice. Polymerase was prepared 1:80 in Duolink Amplification buffer and incubated on coverslips for 100 min at 37°C in a humidified chamber. Final washes were performed in Duolink In Situ Wash Buffer B, then coverslips were mounted on slides using ProLong Gold Antifade Reagent with DAPI. PLA foci were examined using a Nikon fluorescent microscope Eclipse 80i (100 $\times$ /1.4 oil, Melville, NY). Images of at least 50 cells/slide were captured using a CCD (charge-coupled device) camera and the imaging software NIS Elements (BR 3.00, Nikon).

#### *DNA fiber analysis*

Cultured NSCLC cell lines were exposed to iodo-deoxyuridine (IdU; 25  $\mu$ M) for 20 min, then washed and exposed to chloro-deoxyuridine (CldU; 250  $\mu$ M) in fresh media in the presence or absence of 5-azacytidine (500 nM) and/or talazoparib (2 nM or 100 nM) for 30 min. Cells were collected in ice-cold PBS as a  $7.5 \times 10^5$  cells/ml suspension, of which 2  $\mu$ l were dotted onto one end of a microscope slide and allowed to air-dry for 5 min. Cells were lysed in lysis solution (50 mM EDTA, 200 mM Tris-HCl pH 7.4, SDS 0.5%) for 10 min, then slides were tilted to 15 degrees to allow fibers to spread down the length of the slide. After drying for 4h in the dark, fibers were fixed in 3:1 methanol:acetic acid for 10 min, and dried overnight. Subsequently, slides were washed in de-ionized water, immersed in 2.5N hydrochloric acid for 80 min, and then neutralized in 0.4 M Tris-HCl pH 7.4. Slides were washed twice in PBS-T, once in PBS, and then blocked for 1h at room temperature in blocking solution (5% bovine serum albumin, 10% goat serum in PBS-T) under parafilm. Fibers were incubated in primary antibody (rat anti-BrdU for CldU 1:200, mouse anti-BrdU for IdU 1:40) in blocking solution under parafilm for 1 hr at room temperature in a humidified chamber. Washes were repeated, then slides were incubated in secondary antibody (goat anti-rat Alexa 488 1:200, sheep anti-mouse Cy3 1:500) in blocking solution under parafilm for 1 hr at room temperature in a humidified chamber. Following repeat washes, slides were dehydrated in ethanol (2 min each in 70%, 90% and 100% v/v) and airdried, then mounted in Vectashield Antifade mounting medium.

Fibers were examined using a Nikon fluorescent microscope Eclipse 80i (100 $\times$ /1.4 oil, Melville, NY). Images of at least 25 fibers/slide were captured using a CCD (charge-coupled device) camera and the imaging software NIS Elements (BR 3.00, Nikon). Fiber length was quantified using ImageJ software, and a ratio of CldU:IdU length was calculated.

#### *Determination of apoptosis by annexin V staining*

Cells were incubated in the presence of azacytidine (250 nM) and/or talazoparib (2.5 nM) for 4 days, after which they were irradiated at a dose of 4Gy. At the specified time point, cells were collected, washed twice in PBS, and resuspended in 100  $\mu$ l binding buffer (PE Annexin V Apoptosis Detection Kit I, BD Biosciences) at  $1 \times 10^6$  cells/ml. 5  $\mu$ l each of annexin V-PE and 7-AAD were added and the suspension incubated for 15 min at room temperature in the dark. The suspension was made up to 500  $\mu$ l with binding buffer. Analysis of annexin V and 7-AAD staining was performed using a BD FACSCanto II cytometer.

#### *Extrachromosomal homologous recombination and non-homologous end joining assays*

NSCLC cell lines were cultured for 3 days in the presence of 5-azacytidine (500 nM). Nuclear extracts were prepared using the Cell Lytic NuCLEAR Extraction Kit (Sigma-Aldrich). Nuclear extracts were dialysed for two hours using the Plus One Mini Dialysis Kit 1kDa (GE Healthcare) in dialysis solution (20 mM HEPES pH9, 100 mM KCl, 0.2 mM EDTA, 20% glycerol, 0.5 mM DTT, 0.1 mM PMSF). Protein content was quantified by Nanodrop and diluted to 0.5  $\mu$ g/ $\mu$ l in DNase/RNase-free water. For HR assay, diluted nuclear extracts were incubated with 5  $\mu$ l each of dl-1 and dl-2 plasmid (Homologous Recombination Assay Kit, Norgen Biotek) in reaction buffer (for 2 hours at 30°C. For NHEJ assay, pimEJ5GFP was linearized overnight with I-SceI followed by end dephosphorylation using shrimp alkaline phosphatase, then diluted nuclear extracts (2  $\mu$ g) were incubated with 5  $\mu$ l plasmid in ligation buffer (1x T4 ligase buffer, 2 mM ATP, 50  $\mu$ M deoxynucleotide triphosphates) for 2 hours at 37°C. Plasmid DNA was recovered by QIAamp DNA mini kit (Qiagen), and the relative quantity of recombined product was determined by quantitative real-time PCR CFX384 Real Time System (BioRad) using PCR primers spanning the repair site, normalized against amplification of a distant site (for HR, primers supplied by Norgen Biotek; for NHEJ, see Supplementary Experimental Procedures Table S2 for primer details).

#### *Double strand break repair reporter assays*

Stable cell lines expressing pDRGFP (a gift from Maria Jasin; Addgene plasmid # 26475), EJ2GFP-puro, or pimEJ5GFP (gifts from Jeremy Stark; Addgene plasmids #44025 and #44026) were created using a Nucleofector II system (Amaxa). Cells were pretreated for 4 days in the presence of 5-azacytidine (500 nM), then transfected with ISceI using Lipofectamine 3000 (Thermo Scientific). After 72 hours, the repair product was quantified as GFP positivity as determined by flow cytometry using a BD FACSCanto II cytometer.

## Supplementary Figures

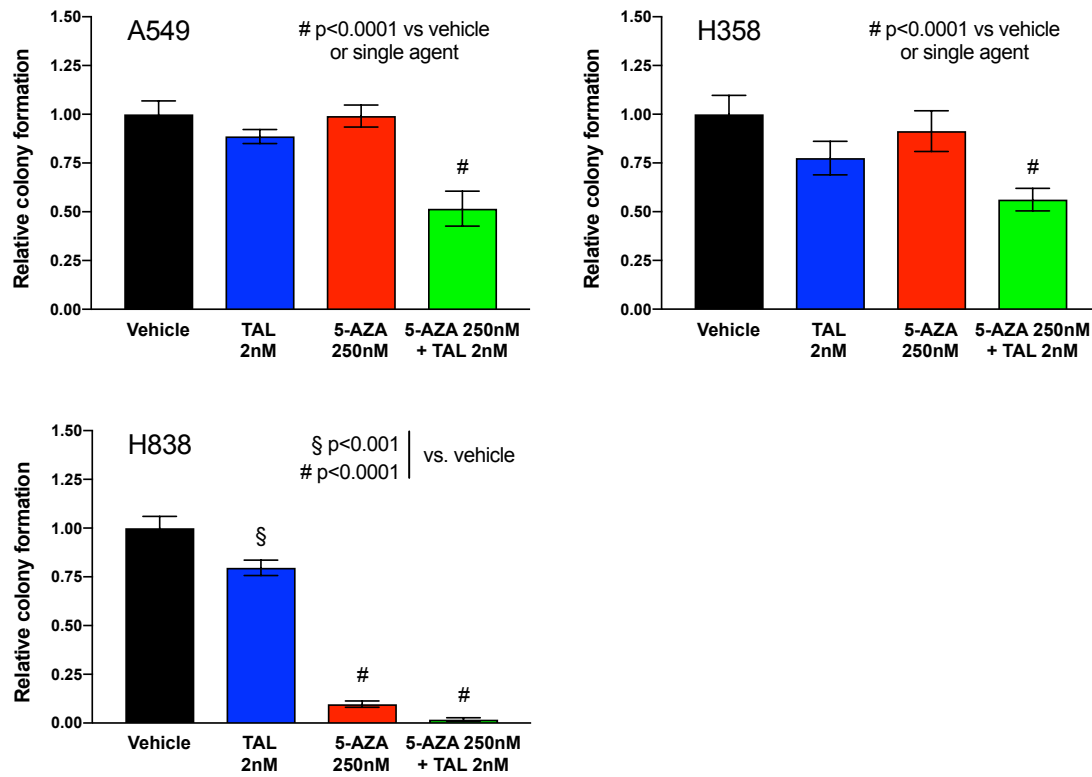

**Fig. S1.** Colony forming assay in NSCLC cell lines. 5-AZA+TAL significantly reduces clonogenicity compared to single agents alone.

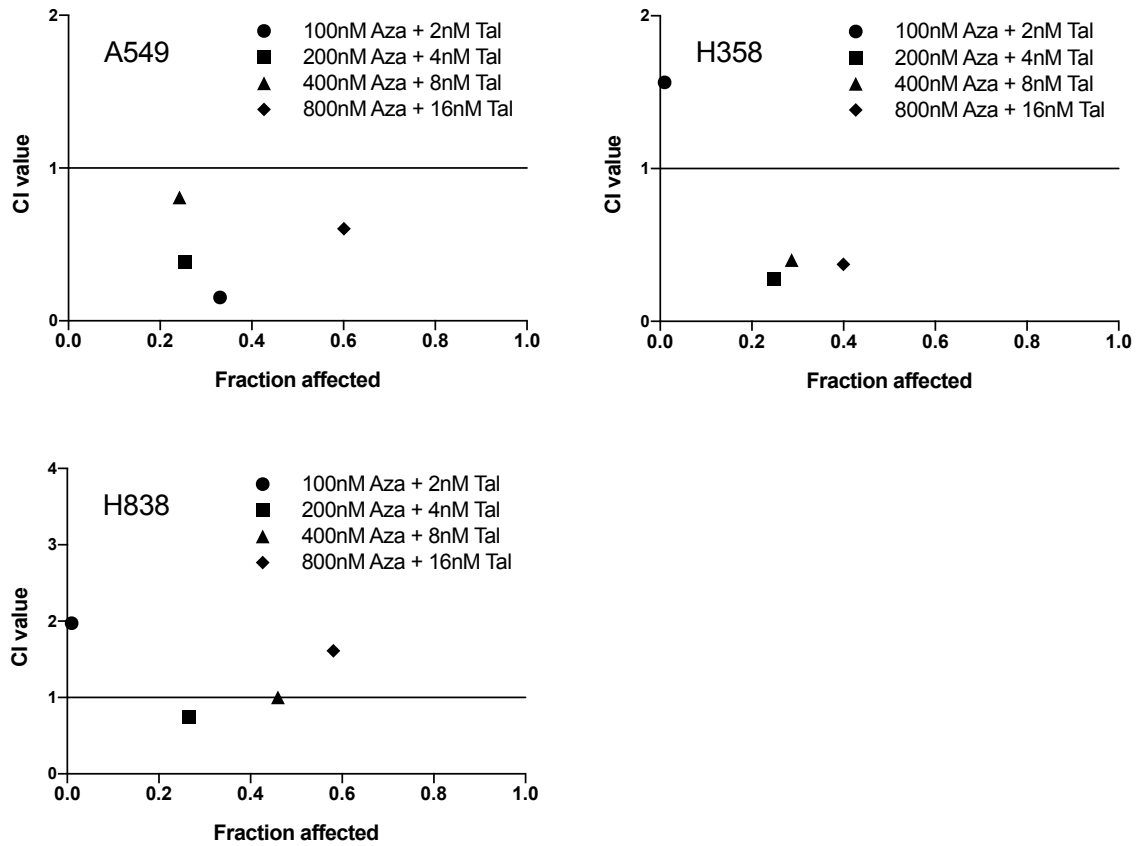

**Fig. S2.** Combination index analysis of 5-AZA+TAL combination in NSCLC. The data indicate that the cytotoxic effect of the 5-AZA+TAL combination is synergistic in A549 and H358 cell lines. H838, which is highly sensitive to single agent 5-AZA, does not exhibit synergistic cytotoxicity in response to the combination.

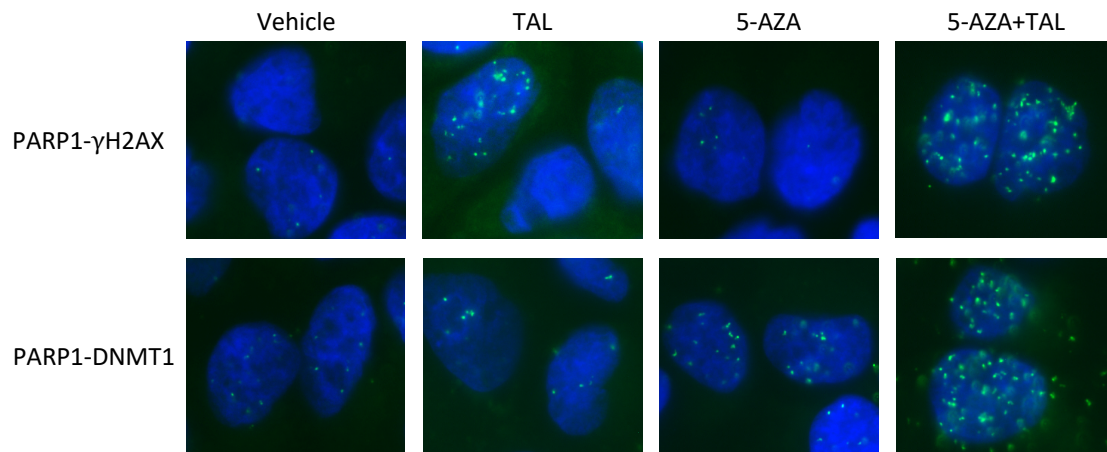

**Fig. S3.** Proximity ligation assay for PARP1- $\gamma$ H2AX and PARP1-DNMT1 colocalization in H460 cells following treatment with TAL, 5-AZA, or combination.

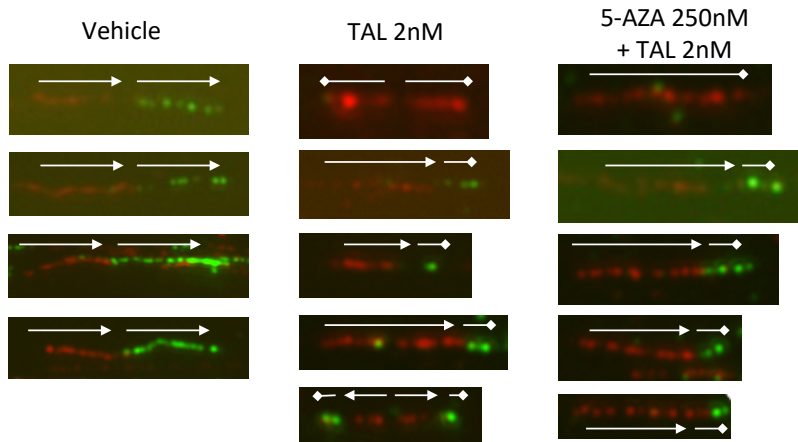

**Fig. S4.** Examples of DNA replication forks following TAL +/- 5-AZA exposure. Red tracts represent IdU incorporation in absence of drug. Green forks represent CldU incorporation following addition of drug. Square arrows indicate abbreviated tract length indicating fork stalling.



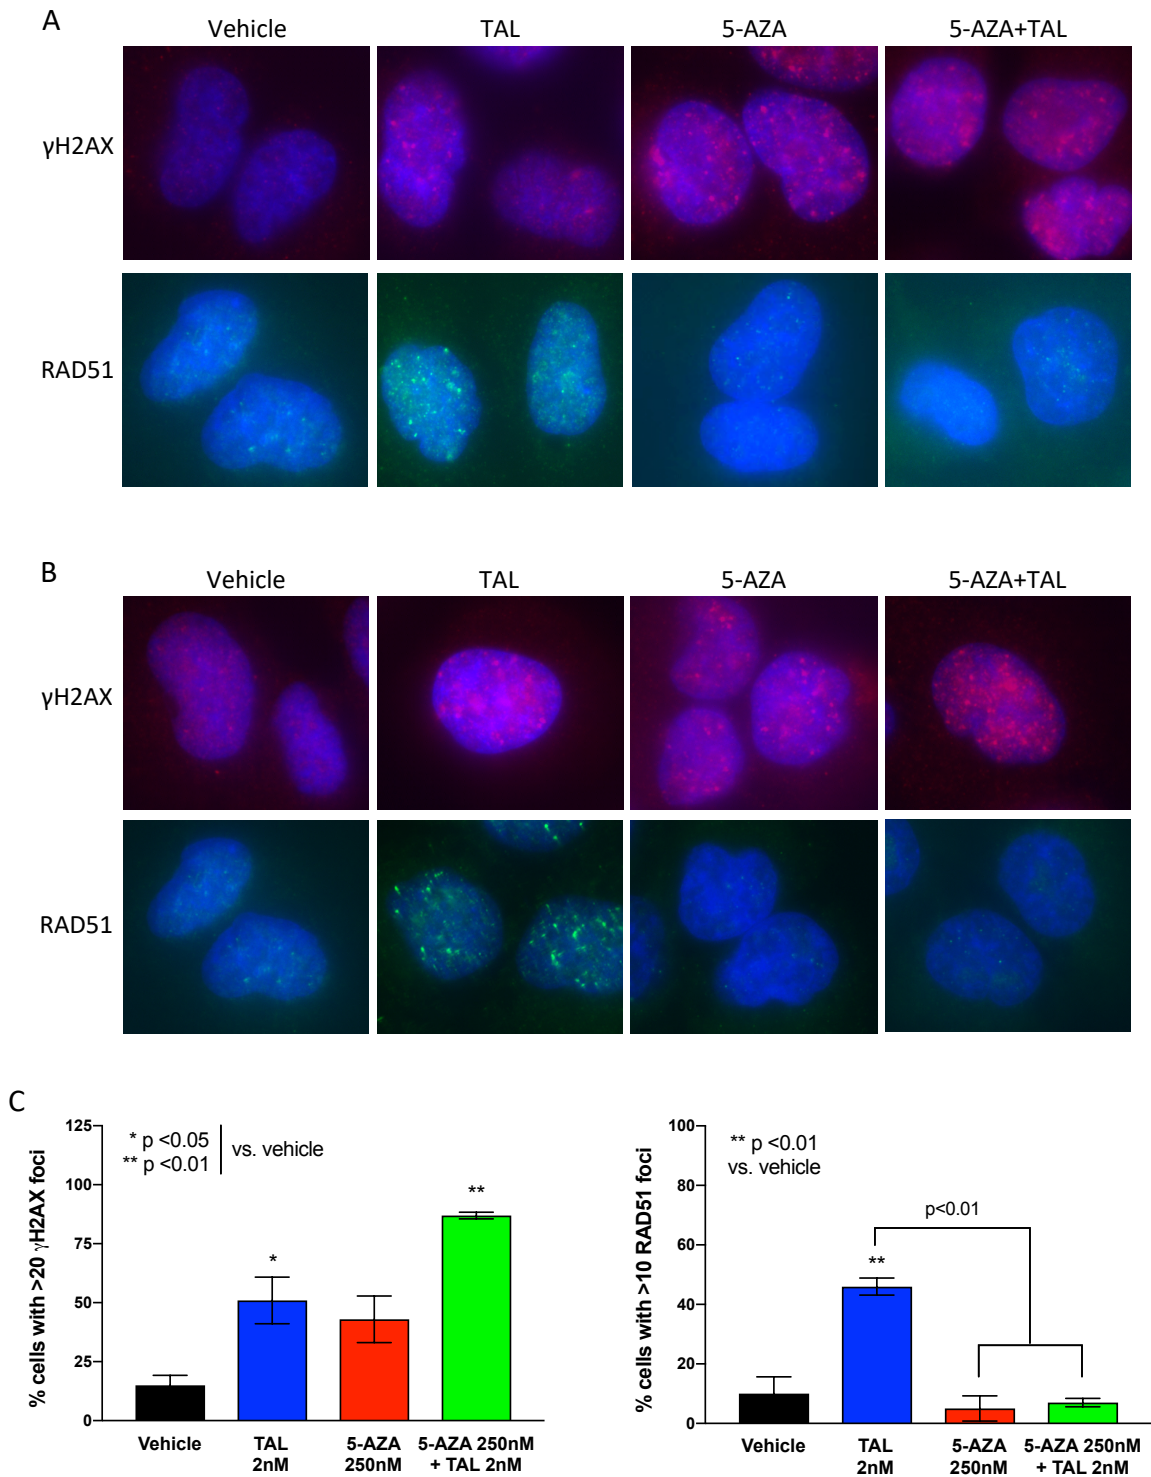

**Fig. S5.** A.  $\gamma$ H2AX and RAD51 foci in H460 cells following 5-AZA, TAL, or combination. B.  $\gamma$ H2AX and RAD51 foci in A549 cells following 5-AZA, TAL, or combination. C. Quantification of  $\gamma$ H2AX and RAD51 foci in A549 cells.

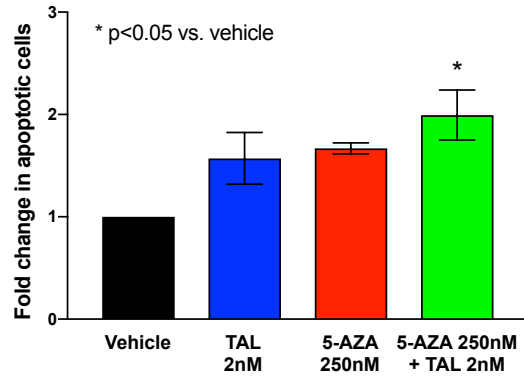

**Fig. S6.** Annexin V flow cytometry indicates a two-fold increase in apoptosis in H460 cells treated with 5-AZA+TAL combination ( $p < 0.05$  compared to vehicle control).

A

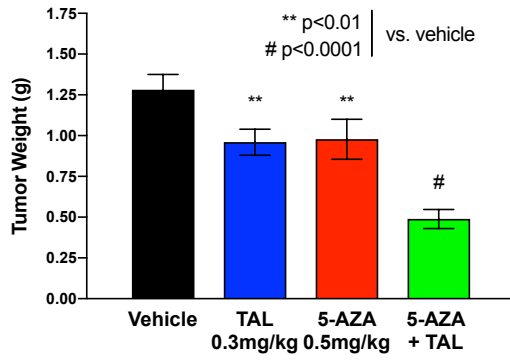

B

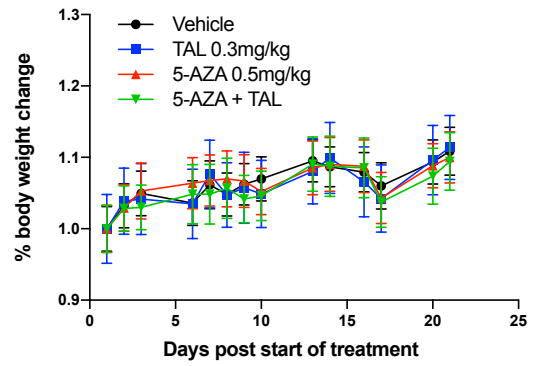

**Fig. S7.** H460 xenograft model treated with TAL and/or 5-AZA. A. Excised tumor weight at study endpoint. B. Body weight on study.

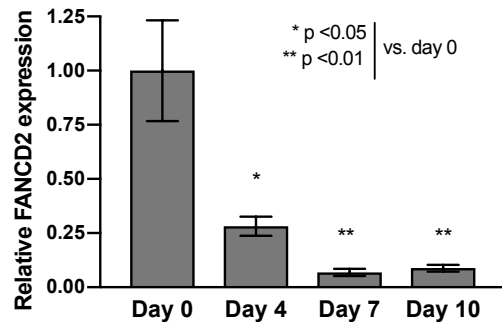

**Fig. S8.** RNA expression of FANCD2 in A549 cells after 5-AZA treatment (250 nM).

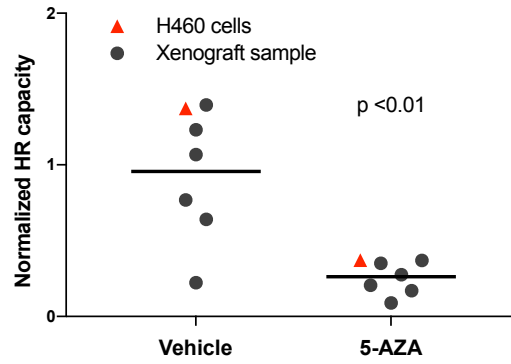

**Fig. S9.** Homologous recombination repair capacity by extrachromosomal assay in samples from *in vivo* H460 NSCLC model (n=8) treated with 5-AZA (0.5mg/kg SC). Data represented as mean per sample over three experiments performed in triplicate, overlaid with group mean  $\pm$  SEM. P value calculated using two-way ANOVA.

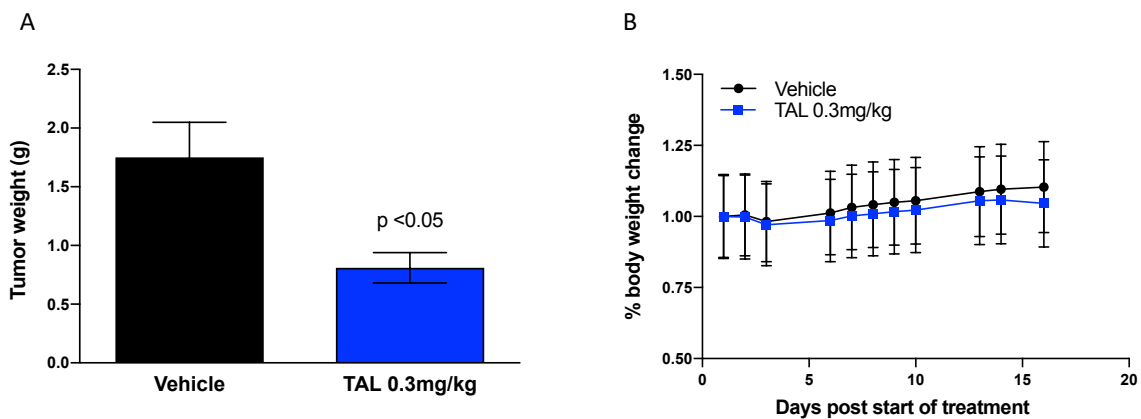

**Fig. S10.** FANCD2-KD H460 xenograft model treated with TAL. A. Excised tumor weight at study endpoint. B. Body weight on study.

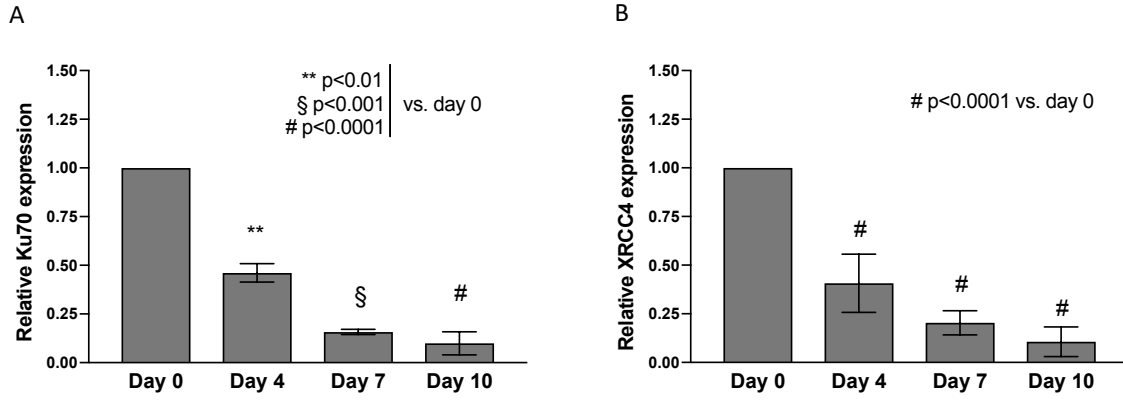

**Fig. S11.** RNA expression of NHEJ factors after 5-AZA treatment (250 nM). A. Ku70 expression. B. XRCC4 expression.

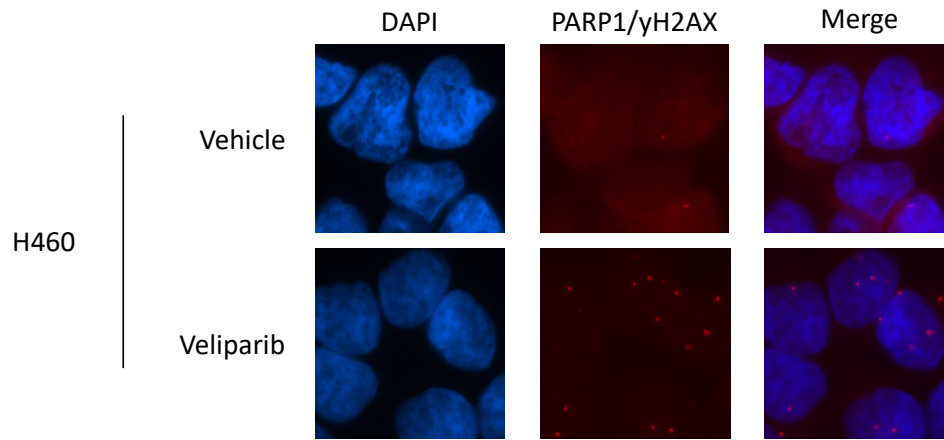

**Fig. S12.** Proximity ligation assay for PARP1- $\gamma$ H2AX colocalization in H460 cells following treatment with veliparib (15nM).



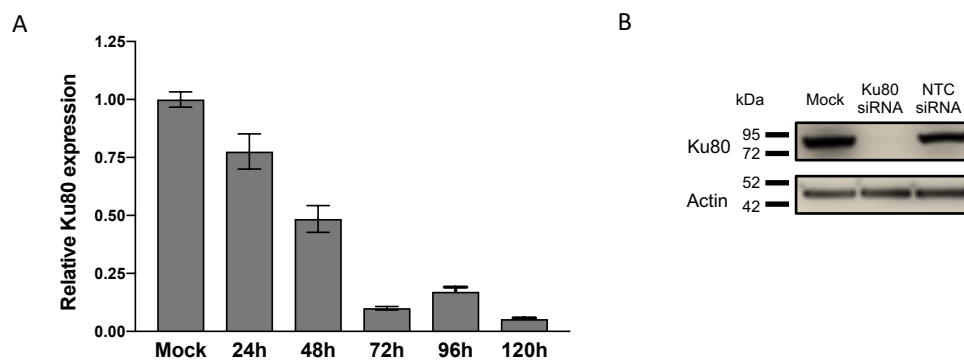

**Fig. S13. A.** Ku80 expression in H460 cells following transfection with Ku80 siRNA. A. Ku80 RNA expression by qRT-PCR. Data represented as mean expression  $\pm$  SEM, normalized against pre-treatment expression level (n=3). B. Ku80 protein expression. NTC = non-targeting control.

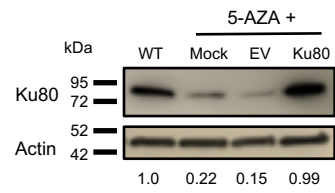

**Fig. S14.** Ku80 protein expression in H460 cells following 5-AZA treatment (250nM, 4 days) followed by nucleofection with Ku80 or empty vector (EV) expression plasmid.

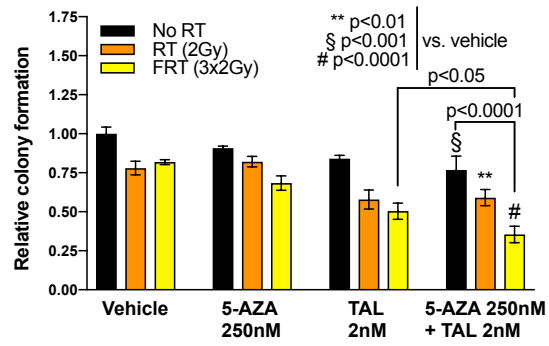

**Fig. S15.** Colony formation in A549 cells is significantly reduced by 5-AZA+TAL in combination with single fraction 2Gy RT or 3x2Gy FRT.

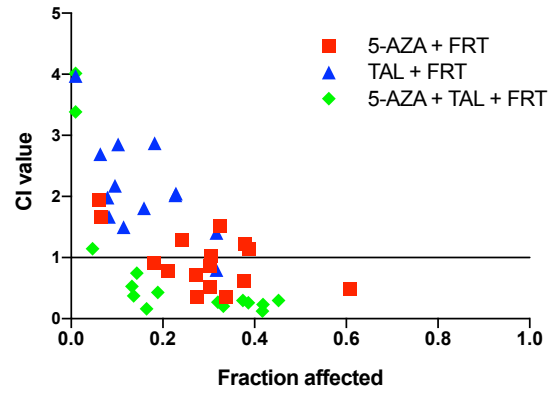

**Fig. S16.** Combination index (CI) plot for 5-AZA+TAL+FRT in H460 cells (n=9).

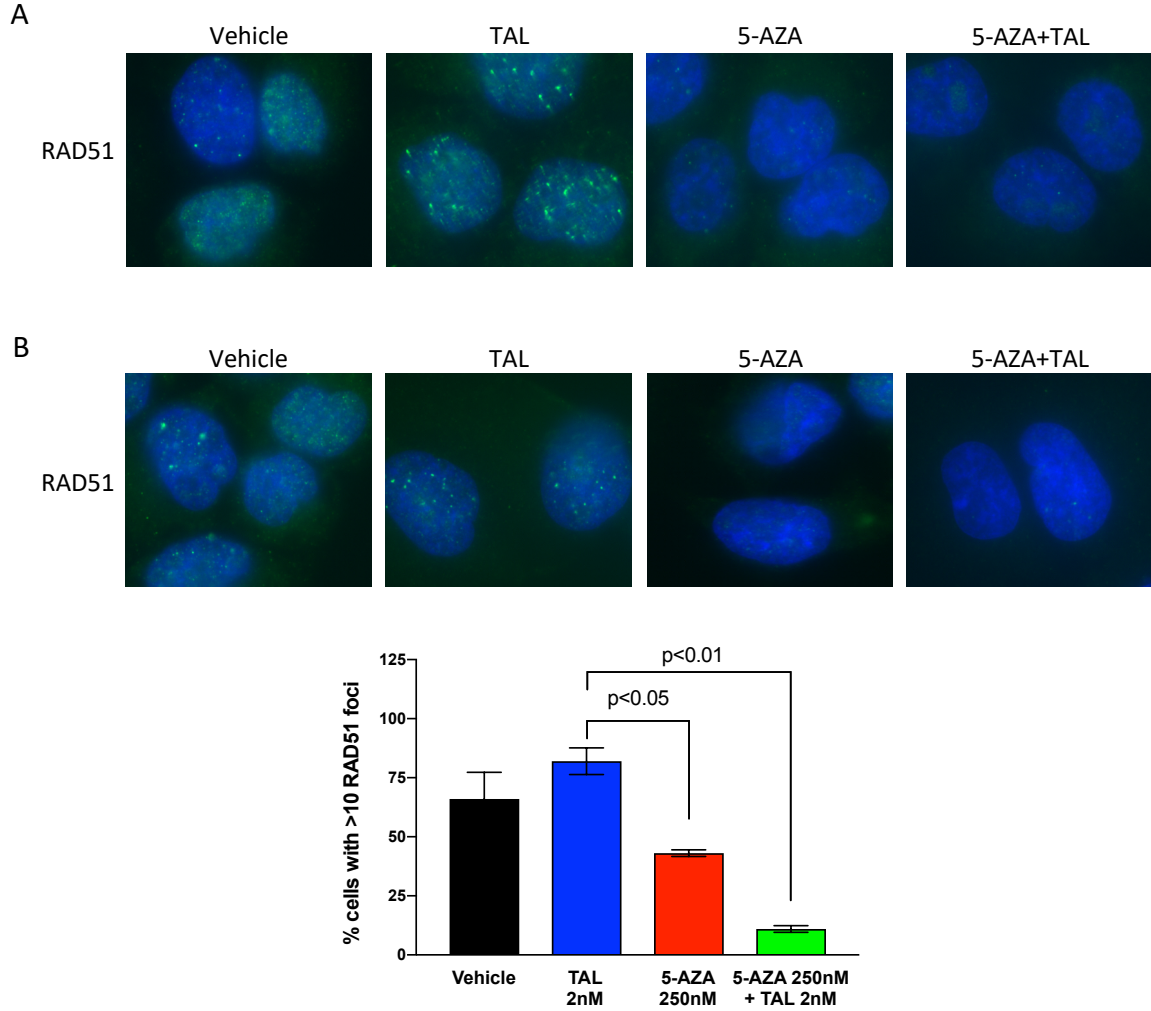

**Fig. S17.** RAD51 foci burden 4 hours following 2Gy RT is decreased in A549 cells treated with 5-AZA and 5-AZA+TAL.

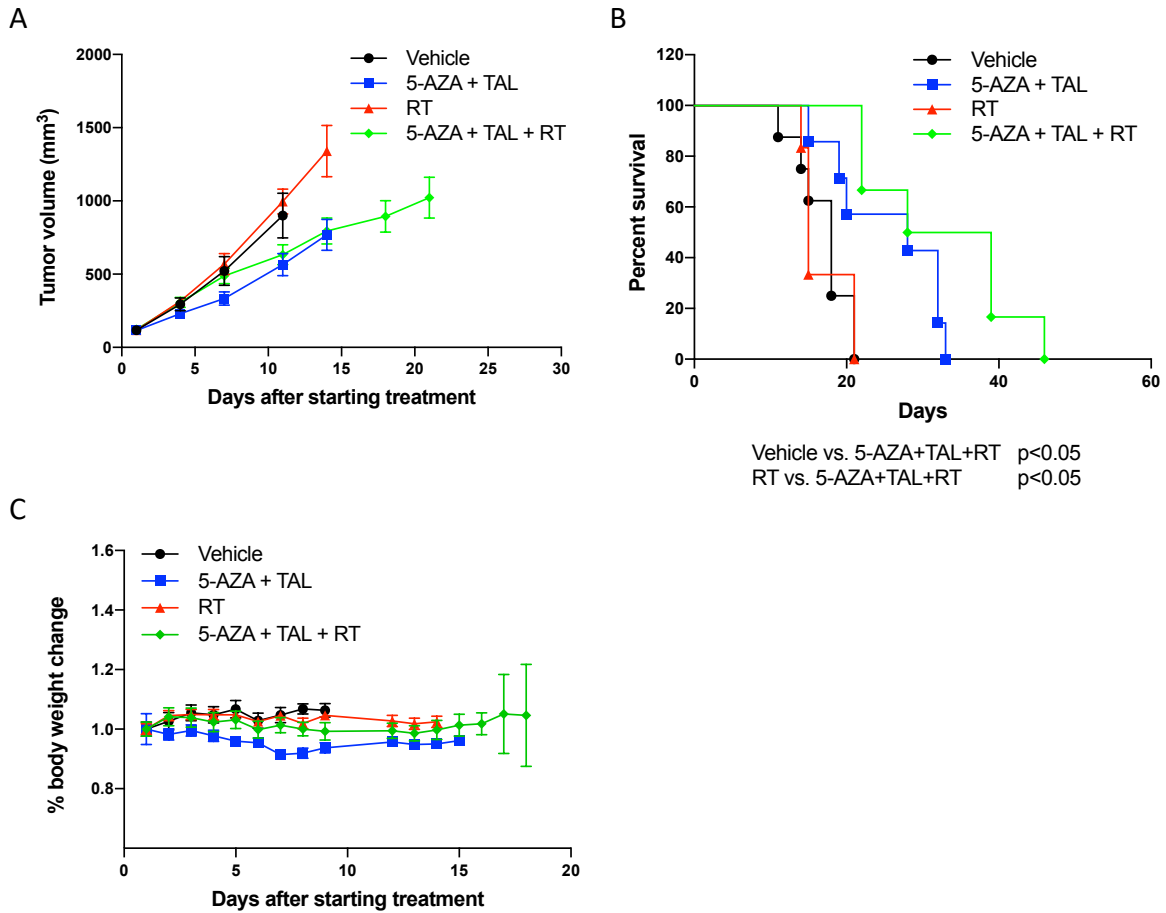

**Fig. S18.** *In vivo* H460 subcutaneous flank injection model, treated with vehicle, 5-AZA (0.5mg/kg) + TAL (0.3mg/kg), RT (2Gy single dose), or 5-AZA+TAL+RT. A. Tumor volume on study. B. Kaplan-Meier survival curve. C. Body weight on study.

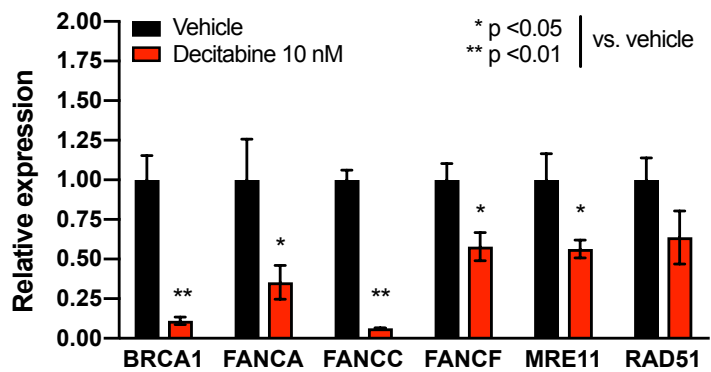

**Fig. S19.** Relative RNA expression of select DNA repair factors in MOLM14 AML cells following decitabine exposure (10 nM; 7 days). Data represented as mean expression  $\pm$  SEM, normalized against GAPDH expression (n=3).

## Supplementary tables

| H460 5-AZA Enriched Pathways                                                                                   | ES      | NES     | NOM p-val | FDR q-val |
|----------------------------------------------------------------------------------------------------------------|---------|---------|-----------|-----------|
| REACTOME_CYTOSOLIC_TRNA_AMINOACYLATION                                                                         | -0.7913 | -2.2294 | 0.0000    | 0.0000    |
| KEGG_AMINOACYL_TRNA_BIOSYNTHESIS                                                                               | -0.7070 | -2.2174 | 0.0000    | 0.0000    |
| REACTOME_TRNA_AMINOACYLATION                                                                                   | -0.7052 | -2.2038 | 0.0000    | 0.0000    |
| REACTOME_MITOTIC_PROMETAPHASE                                                                                  | -0.6028 | -2.1668 | 0.0000    | 0.0000    |
| REACTOME_FANCONI_ANEMIA_PATHWAY                                                                                | -0.7782 | -2.1278 | 0.0000    | 0.0000    |
| REACTOME_MITOTIC_M_M_G1_PHASES                                                                                 | -0.5243 | -2.0485 | 0.0000    | 0.0014    |
| REACTOME_AMINO_ACID_TRANSPORT_ACROSS_THE_PLASMA_MEMBRANE                                                       | -0.6873 | -2.0344 | 0.0000    | 0.0012    |
| REACTOME_DNA_REPLICATION                                                                                       | -0.4992 | -2.0308 | 0.0000    | 0.0010    |
| KEGG_ONE_CARBON_POOL_BY_FOLATE                                                                                 | -0.7937 | -2.0196 | 0.0000    | 0.0004    |
| REACTOME_CELL_CYCLE_MITOTIC                                                                                    | -0.4672 | -1.9644 | 0.0000    | 0.0036    |
| REACTOME_BILE_ACID_AND_BILE_SALT_METABOLISM                                                                    | -0.6949 | -1.9543 | 0.0000    | 0.0041    |
| REACTOME_AMINO_ACID_SYNTHESIS_AND_INTERCONVERSION_TRANSAMINATION                                               | -0.7965 | -1.9532 | 0.0000    | 0.0037    |
| REACTOME_G2_M_CHECKPOINTS                                                                                      | -0.6261 | -1.9308 | 0.0000    | 0.0049    |
| REACTOME_MITOCHONDRIAL_PROTEIN_IMPORT                                                                          | -0.5853 | -1.8968 | 0.0000    | 0.0074    |
| REACTOME_3_UTR_MEDIATED_TRANSLATIONAL_REGULATION                                                               | -0.5080 | -1.8830 | 0.0000    | 0.0080    |
| REACTOME_DNA_REPAIR                                                                                            | -0.5093 | -1.8771 | 0.0000    | 0.0081    |
| REACTOME_ACTIVATION_OF_GENES_BY_ATF4                                                                           | -0.6649 | -1.8686 | 0.0000    | 0.0094    |
| KEGG_RIBOSOME                                                                                                  | -0.5153 | -1.8398 | 0.0000    | 0.0127    |
| REACTOME_CELL_CYCLE                                                                                            | -0.4237 | -1.8350 | 0.0000    | 0.0154    |
| REACTOME_SYNTHESIS_OF_BILE_ACIDS_AND_BILE_SALTS                                                                | -0.6936 | -1.8334 | 0.0000    | 0.0148    |
| REACTOME_MITOCHONDRIAL_TRNA_AMINOACYLATION                                                                     | -0.6683 | -1.8319 | 0.0000    | 0.0143    |
| REACTOME_PEPTIDE_CHAIN_ELONGATION                                                                              | -0.5087 | -1.8309 | 0.0000    | 0.0136    |
| REACTOME_PERK_REGULATED_GENE_EXPRESSION                                                                        | -0.6378 | -1.8254 | 0.0000    | 0.0139    |
| REACTOME_CHOLESTEROL_BIOSYNTHESIS                                                                              | -0.6605 | -1.8249 | 0.0000    | 0.0133    |
| KEGG_STEROID_BIOSYNTHESIS                                                                                      | -0.7042 | -1.7978 | 0.0000    | 0.0172    |
| REACTOME_APC_CDC20_MEDIATED_DEGRADATION_OF_NEK2A                                                               | -0.6582 | -1.7900 | 0.0020    | 0.0205    |
| KEGG_PROANOATE_METABOLISM                                                                                      | -0.5894 | -1.7789 | 0.0000    | 0.0184    |
| REACTOME_AMINO_ACID_AND_OLIGOPEPTIDE_SLC_TRANSPORTERS                                                          | -0.5454 | -1.7543 | 0.0000    | 0.0304    |
| KEGG_GLYCOSYLPHOSPHATIDYLINOSITOL_GPI_ANCHOR_BIOSYNTHESIS                                                      | -0.6170 | -1.7477 | 0.0066    | 0.0240    |
| REACTOME_DOUBLE_STRAND_BREAK_REPAIR                                                                            | -0.6311 | -1.7448 | 0.0020    | 0.0320    |
| REACTOME_HOMOLOGOUS_RECOMBINATION_REPAIR_OF_REPLICATION_INDEPENDENT_DOUBLE_STRAND_BREAKS                       | -0.6834 | -1.7420 | 0.0098    | 0.0318    |
| REACTOME_DEADENYLATION_DEPENDENT_MRNA_DECAY                                                                    | -0.5474 | -1.7411 | 0.0000    | 0.0311    |
| KEGG_BUTANOATE_METABOLISM                                                                                      | -0.5824 | -1.7407 | 0.0021    | 0.0216    |
| KEGG_CELL_CYCLE                                                                                                | -0.4552 | -1.7396 | 0.0000    | 0.0191    |
| REACTOME_ACTIVATION_OF_ATR_IN_RESPONSE_TO_REPLICATION_STRESS                                                   | -0.5706 | -1.7385 | 0.0000    | 0.0308    |
| REACTOME_ACTIVATION_OF_THE_MRNA_UPON_BINDING_OF_THE_CAP_BINDING_COMPLEX_AND_EIFS_AND_SUBSEQUENT_BINDING_TO_43S | -0.5170 | -1.7347 | 0.0024    | 0.0313    |
| KEGG_PRIMARY_BILE_ACID_BIOSYNTHESIS                                                                            | -0.7084 | -1.7310 | 0.0041    | 0.0188    |
| REACTOME_GENERIC_TRANSCRIPTION_PATHWAY                                                                         | -0.4012 | -1.7231 | 0.0000    | 0.0348    |
| REACTOME_RNA_POL_I_TRANSCRIPTION_TERMINATION                                                                   | -0.6463 | -1.7143 | 0.0041    | 0.0365    |
| REACTOME_NONSENSE_MEDIATED_DECAY_ENHANCED_BY_THE_EXON_JUNCTION_COMPLEX                                         | -0.4570 | -1.7109 | 0.0000    | 0.0367    |
| REACTOME_RNA_POL_I_TRANSCRIPTION_INITIATION                                                                    | -0.6252 | -1.7086 | 0.0021    | 0.0364    |
| REACTOME_EXTENSION_OF_TELOMERES                                                                                | -0.5808 | -1.6994 | 0.0064    | 0.0394    |
| REACTOME_MITOTIC_G2_G2_M_PHASES                                                                                | -0.4677 | -1.6833 | 0.0000    | 0.0451    |
| REACTOME_FATTY_ACYL_COA_BIOSYNTHESIS                                                                           | -0.6431 | -1.6818 | 0.0043    | 0.0443    |
| REACTOME_METABOLISM_OF_RNA                                                                                     | -0.4049 | -1.6816 | 0.0000    | 0.0432    |



|                                                                                                             |         |         |        |        |
|-------------------------------------------------------------------------------------------------------------|---------|---------|--------|--------|
| REACTOME_GLOBAL_GENOMIC_NER_GG_NER                                                                          | -0.5700 | -1.6810 | 0.0044 | 0.0423 |
| KEGG_MISMATCH_REPAIR                                                                                        | -0.6111 | -1.6727 | 0.0166 | 0.0319 |
| KEGG_PYRUVATE_METABOLISM                                                                                    | -0.5287 | -1.6651 | 0.0048 | 0.0318 |
| REACTOME_INTERACTIONS_OF_VPR_WITH_HOST_CELLULAR_PROTEINS                                                    | -0.5572 | -1.6599 | 0.0043 | 0.0512 |
| KEGG_CITRATE_CYCLE_TCA_CYCLE                                                                                | -0.5683 | -1.6594 | 0.0064 | 0.0306 |
| REACTOME_POST_TRANSLATIONAL_MODIFICATION_SYNTHESIS_OF_GPI_ANCHORED_PROTEINS                                 | -0.5882 | -1.6547 | 0.0046 | 0.0528 |
| REACTOME_TRANSLATION                                                                                        | -0.4238 | -1.6544 | 0.0000 | 0.0517 |
| KEGG_N_GLYCAN_BIOSYNTHESIS                                                                                  | -0.5099 | -1.6520 | 0.0086 | 0.0297 |
| REACTOME_ACTIVATION_OF_THE_PRE_REPLICATIVE_COMPLEX                                                          | -0.5603 | -1.6463 | 0.0089 | 0.0550 |
| REACTOME_DEADENYLATION_OF_MRNA                                                                              | -0.6203 | -1.6453 | 0.0210 | 0.0541 |
| REACTOME_INHIBITION_OF_THE_PROTEOLYTIC_ACTIVITY_OF_APC_C_REQUIRED_FOR_THE_ONSET_OF_ANAPHASE_BY_MITOTIC_SPIN |         |         |        |        |
| DLE_CHECKPOINT_COMPONENTS                                                                                   | -0.6273 | -1.6377 | 0.0165 | 0.0565 |
| KEGG_TERPENOID_BACKBONE_BIOSYNTHESIS                                                                        | -0.6589 | -1.6357 | 0.0101 | 0.0327 |
| REACTOME_CELL_CYCLE_CHECKPOINTS                                                                             | -0.4324 | -1.6230 | 0.0000 | 0.0636 |
| REACTOME_CITRIC_ACID_CYCLE_TCA_CYCLE                                                                        | -0.6161 | -1.6077 | 0.0108 | 0.0727 |
| KEGG_PURINE_METABOLISM                                                                                      | -0.4039 | -1.5983 | 0.0000 | 0.0448 |
| REACTOME_CYCLIN_A_B1_ASSOCIATED_EVENTS_DURING_G2_M_TRANSITION                                               | -0.6330 | -1.5933 | 0.0329 | 0.0811 |
| REACTOME_G1_S_TRANSITION                                                                                    | -0.4252 | -1.5854 | 0.0025 | 0.0856 |
| REACTOME_SYNTHESIS_OF_GLYCOSYLPHOSPHATIDYLINOSITOL_GPI                                                      | -0.6125 | -1.5817 | 0.0279 | 0.0863 |
| KEGG_DNA_REPLICATION                                                                                        | -0.5195 | -1.5681 | 0.0175 | 0.0547 |
| REACTOME_FORMATION_OF_THE_TERNARY_COMPLEX_AND_SUBSEQUENTLY_THE_43S_COMPLEX                                  | -0.4881 | -1.5664 | 0.0177 | 0.0955 |
| REACTOME_PYRUVATE_METABOLISM_AND_CITRIC_ACID_TCA_CYCLE                                                      | -0.5041 | -1.5664 | 0.0089 | 0.0937 |
| REACTOME_SMAD2_SMAD3_SMAD4_HETEROTRIMER_REGULATES_TRANSCRIPTION                                             | -0.5576 | -1.5661 | 0.0172 | 0.0920 |
| REACTOME_FORMATION_OF_INCISION_COMPLEX_IN_GG_NER                                                            | -0.5880 | -1.5507 | 0.0262 | 0.1019 |
| REACTOME_METABOLISM_OF_MRNA                                                                                 | -0.3790 | -1.5455 | 0.0000 | 0.1038 |
| REACTOME_FORMATION_OF_ATP_BY_CHEMIOSMOTIC_COUPLING                                                          | -0.6112 | -1.5366 | 0.0356 | 0.1099 |
| KEGG_HOMOLOGOUS_RECOMBINATION                                                                               | -0.5322 | -1.5349 | 0.0328 | 0.0682 |
| REACTOME_SRP_DEPENDENT_COTRANSLATIONAL_PROTEIN_TARGETING_TO_MEMBRANE                                        | -0.4071 | -1.5328 | 0.0071 | 0.1116 |
| KEGG_NUCLEOTIDE_EXCISION_REPAIR                                                                             | -0.4763 | -1.5302 | 0.0200 | 0.0673 |
| REACTOME_CHROMOSOME_MAINTENANCE                                                                             | -0.4065 | -1.5261 | 0.0026 | 0.1156 |
| REACTOME_INFLUENZA_VIRAL_RNA_TRANSCRIPTION_AND_REPLICATION                                                  | -0.4146 | -1.5140 | 0.0050 | 0.1244 |
| REACTOME_S_PHASE                                                                                            | -0.4009 | -1.5062 | 0.0077 | 0.1298 |
| REACTOME_SYNTHESIS_OF_BILE_ACIDS_AND_BILE_SALTS_VIA_7ALPHA_HYDROXYCHOLESTEROL                               | -0.6075 | -1.5046 | 0.0427 | 0.1290 |
| REACTOME_LOSS_OF_NLP_FROM_MITOTIC_CENTROSOMES                                                               | -0.4593 | -1.4993 | 0.0156 | 0.1320 |
| REACTOME_MITOTIC_G1_G1_S_PHASES                                                                             | -0.3910 | -1.4930 | 0.0051 | 0.1356 |
| KEGG_GLYOXYLATE_AND_DICARBOXYLATE_METABOLISM                                                                | -0.5917 | -1.4925 | 0.0464 | 0.0858 |
| REACTOME_TRIGLYCERIDE_BIOSYNTHESIS                                                                          | -0.4823 | -1.4921 | 0.0213 | 0.1342 |
| KEGG_VALINE_LEUCINE_AND_ISOLEUCINE_DEGRADATION                                                              | -0.4768 | -1.4920 | 0.0172 | 0.0816 |
| REACTOME_SYNTHESIS_OF_PIP3_AT_THE_GOLGI_MEMBRANE                                                            | -0.5854 | -1.4867 | 0.0540 | 0.1373 |
| REACTOME_METABOLISM_OF_NON_CODING_RNA                                                                       | -0.4663 | -1.4845 | 0.0207 | 0.1375 |
| REACTOME_INFLUENZA_LIFE_CYCLE                                                                               | -0.3830 | -1.4820 | 0.0097 | 0.1381 |
| KEGG_METABOLISM_OF_XENOBIOTICS_BY_CYTOCHROME_P450                                                           | -0.4358 | -1.4771 | 0.0208 | 0.0864 |
| REACTOME_NEP_NS2_INTERACTS_WITH_THE_CELLULAR_EXPORT_MACHINERY                                               | -0.5132 | -1.4754 | 0.0409 | 0.1426 |
| REACTOME_TCA_CYCLE_AND_RESPIRATORY_ELECTRON_TRANSPORT                                                       | -0.3872 | -1.4710 | 0.0000 | 0.1453 |
| REACTOME_NA_CL_DEPENDENT_NEUROTRANSMITTER_TRANSPORTERS                                                      | -0.5699 | -1.4502 | 0.0817 | 0.1663 |
| REACTOME_NUCLEOTIDE_EXCISION_REPAIR                                                                         | -0.4610 | -1.4442 | 0.0414 | 0.1712 |
| REACTOME_METABOLISM_OF_NUCLEOTIDES                                                                          | -0.4149 | -1.4388 | 0.0238 | 0.1752 |

|                                                                           |         |         |        |        |
|---------------------------------------------------------------------------|---------|---------|--------|--------|
| KEGG_CYSTEINE_AND_METHIONINE_METABOLISM                                   | -0.4709 | -1.4353 | 0.0621 | 0.1138 |
| REACTOME_RECRUITMENT_OF_MITOTIC_CENTROSOME_PROTEINS_AND_COMPLEXES         | -0.4302 | -1.4325 | 0.0156 | 0.1808 |
| KEGG_GLYCINE_SERINE_AND_THREONINE_METABOLISM                              | -0.4906 | -1.4319 | 0.0521 | 0.1119 |
| REACTOME_PKB_MEDIATED_EVENTS                                              | -0.4963 | -1.4282 | 0.0551 | 0.1838 |
| KEGG_PYRIMIDINE_METABOLISM                                                | -0.3859 | -1.4222 | 0.0234 | 0.1151 |
| KEGG_FRUCTOSE_AND_MANNOSE_METABOLISM                                      | -0.4633 | -1.4184 | 0.0650 | 0.1136 |
| KEGG_RNA_DEGRADATION                                                      | -0.4282 | -1.4069 | 0.0304 | 0.1195 |
| REACTOME_METABOLISM_OF_PROTEINS                                           | -0.3209 | -1.4052 | 0.0000 | 0.2128 |
| REACTOME_DESTABILIZATION_OF_MRNA_BY_KSRP                                  | -0.5354 | -1.3986 | 0.0911 | 0.2198 |
| REACTOME_GLUCOSE_TRANSPORT                                                | -0.4476 | -1.3945 | 0.0641 | 0.2228 |
| KEGG_SELENOAMINO_ACID_METABOLISM                                          | -0.5027 | -1.3924 | 0.0699 | 0.1284 |
| REACTOME_LAGGING_STRAND_SYNTHESIS                                         | -0.5276 | -1.3902 | 0.1049 | 0.2260 |
| KEGG_PROGESTERONE_MEDIATED_OOCYTE_MATURATION                              | -0.3856 | -1.3882 | 0.0295 | 0.1272 |
| REACTOME_DEPOSITION_OF_NEW_CENPA_CONTAINING_NUCLEOSOMES_AT_THE_CENTROMERE | -0.4165 | -1.3824 | 0.0474 | 0.2358 |
| REACTOME_REGULATION_OF_MITOTIC_CELL_CYCLE                                 | -0.3938 | -1.3799 | 0.0313 | 0.2363 |
| KEGG_ABC_TRANSPORTERS                                                     | -0.4396 | -1.3795 | 0.0505 | 0.1308 |
| REACTOME_SULFUR_AMINO_ACID_METABOLISM                                     | -0.4935 | -1.3775 | 0.0903 | 0.2368 |
| KEGG_ALANINE_ASPARTATE_AND_Glutamate_METABOLISM                           | -0.4641 | -1.3773 | 0.0882 | 0.1283 |
| REACTOME_DNA_STRAND_ELONGATION                                            | -0.4744 | -1.3740 | 0.0732 | 0.2390 |
| REACTOME_ASPARAGINE_N_LINKED_GLYCOSYLATION                                | -0.3893 | -1.3711 | 0.0476 | 0.2403 |
| REACTOME_TRANSPORT_OF_RIBONUCLEOPROTEINS_INTO_THE_HOST_NUCLEUS            | -0.4909 | -1.3705 | 0.0996 | 0.2383 |
| REACTOME_FATTY_ACID_TRIACYLGLYCEROL_AND_KETONE_BODY_METABOLISM            | -0.3495 | -1.3704 | 0.0212 | 0.2355 |
| REACTOME_E2F_MEDIATED_REGULATION_OF_DNA_REPLICATION                       | -0.4666 | -1.3631 | 0.0691 | 0.2441 |
| REACTOME_APC_C_CDC20_MEDIATED_DEGRADATION_OF_CYCLIN_B                     | -0.5183 | -1.3590 | 0.1225 | 0.2475 |
| REACTOME_SLC_MEDIATED_TRANSMEMBRANE_TRANSPORT                             | -0.3283 | -1.3558 | 0.0031 | 0.2494 |
| REACTOME_PLATELET_SENSITIZATION_BY_LDL                                    | -0.5341 | -1.3540 | 0.1181 | 0.2491 |
| REACTOME_TRANSCRIPTION_COUPLED_NER_TC_NER                                 | -0.4374 | -1.3517 | 0.0742 | 0.2499 |
| KEGG_HISTIDINE_METABOLISM                                                 | -0.4601 | -1.3277 | 0.1141 | 0.1751 |
| KEGG_OOCYTE_MEIOSIS                                                       | -0.3474 | -1.3238 | 0.0386 | 0.1745 |
| KEGG_BASE_EXCISION_REPAIR                                                 | -0.4305 | -1.3121 | 0.1052 | 0.1817 |
| KEGG_LYSINE_DEGRADATION                                                   | -0.4012 | -1.3039 | 0.0766 | 0.1859 |
| KEGG_GLYCOSAMINOGLYCAN_BIOSYNTHESIS_HEPARAN_SULFATE                       | -0.4504 | -1.2829 | 0.1553 | 0.2049 |
| KEGG_PANTOTHENATE_AND_COA_BIOSYNTHESIS                                    | -0.5102 | -1.2814 | 0.1860 | 0.2014 |
| KEGG_FATTY_ACID_METABOLISM                                                | -0.4111 | -1.2803 | 0.1295 | 0.1971 |
| KEGG_SPLICEOSOME                                                          | -0.3327 | -1.2641 | 0.0638 | 0.2123 |
| KEGG_BIOSYNTHESIS_OF_UNSATURATED_FATTY_ACIDS                              | -0.4670 | -1.2514 | 0.1912 | 0.2229 |
| KEGG_VEGF_SIGNALING_PATHWAY                                               | 0.4259  | 1.3828  | 0.0626 | 0.2479 |
| KEGG_NATURAL_KILLER_CELL_MEDIATED_CYTOTOXICITY                            | 0.4004  | 1.3953  | 0.0376 | 0.2369 |
| KEGG_NEUROACTIVE_LIGAND_RECEPTOR_INTERACTION                              | 0.3648  | 1.3987  | 0.0120 | 0.2397 |
| KEGG_PRION_DISEASES                                                       | 0.4966  | 1.4039  | 0.1028 | 0.2401 |
| KEGG_TIGHT_JUNCTION                                                       | 0.4035  | 1.4148  | 0.0286 | 0.2326 |
| KEGG_PHOSPHATIDYLINOSITOL_SIGNALING_SYSTEM                                | 0.4361  | 1.4231  | 0.0342 | 0.2278 |
| KEGG_AXON_GUIDANCE                                                        | 0.4069  | 1.4463  | 0.0159 | 0.2017 |
| KEGG_ENDOCYTOSIS                                                          | 0.3971  | 1.4506  | 0.0121 | 0.2036 |
| KEGG_CYTOSOLIC_DNA_SENSING_PATHWAY                                        | 0.4768  | 1.4785  | 0.0477 | 0.1756 |
| KEGG_GAP_JUNCTION                                                         | 0.4474  | 1.4868  | 0.0070 | 0.1729 |
| KEGG_VIRAL_MYOCARDITIS                                                    | 0.4628  | 1.4869  | 0.0329 | 0.1811 |

|                                                                           |        |        |        |        |
|---------------------------------------------------------------------------|--------|--------|--------|--------|
| KEGG_COMPLEMENT_AND_COAGULATION_CASCADES                                  | 0.4581 | 1.4888 | 0.0294 | 0.1872 |
| KEGG_CYTOKINE_CYTOKINE_RECEPTOR_INTERACTION                               | 0.3922 | 1.4889 | 0.0073 | 0.1967 |
| KEGG_SPHINGOLIPID_METABOLISM                                              | 0.5207 | 1.5118 | 0.0395 | 0.1746 |
| KEGG_BLADDER_CANCER                                                       | 0.5221 | 1.5153 | 0.0298 | 0.1809 |
| KEGG_ANTIGEN_PROCESSING_AND_PRESENTATION                                  | 0.4728 | 1.5373 | 0.0174 | 0.1606 |
| KEGG_LYSOSOME                                                             | 0.4409 | 1.5458 | 0.0047 | 0.1595 |
| KEGG_TGF_BETA_SIGNALING_PATHWAY                                           | 0.4727 | 1.5491 | 0.0102 | 0.1663 |
| KEGG_GRAFT_VERSUS_HOST_DISEASE                                            | 0.5326 | 1.5497 | 0.0297 | 0.1782 |
| KEGG_PATHOGENIC_ESCHERICHIA_COLI_INFECTION                                | 0.5174 | 1.5637 | 0.0203 | 0.1725 |
| KEGG_DILATED_CARDIOMYOPATHY                                               | 0.4702 | 1.5938 | 0.0070 | 0.1452 |
| KEGG_STARCH_AND_SUCROSE_METABOLISM                                        | 0.5468 | 1.5949 | 0.0189 | 0.1592 |
| REACTOME_GASTRIN_CREB_SIGNALLING_PATHWAY_VIA_PKC_AND_MAPK                 | 0.4343 | 1.6056 | 0.0016 | 0.2477 |
| REACTOME_AMINE_DERIVED_HORMONES                                           | 0.6871 | 1.6148 | 0.0285 | 0.2452 |
| KEGG_FC_GAMMA_R_MEDIATED_PHAGOCYTOSIS                                     | 0.4795 | 1.6295 | 0.0065 | 0.1281 |
| REACTOME_OTHER_SEMAPHORIN_INTERACTIONS                                    | 0.6904 | 1.6298 | 0.0283 | 0.2326 |
| KEGG_CELL_ADHESION_MOLECULES_CAMS                                         | 0.4644 | 1.6341 | 0.0000 | 0.1396 |
| REACTOME_G_ALPHA_Q_SIGNALLING_EVENTS                                      | 0.4498 | 1.6497 | 0.0000 | 0.2098 |
| KEGG_FOCAL_ADHESION                                                       | 0.4495 | 1.6761 | 0.0000 | 0.1057 |
| KEGG_AUTOIMMUNE_THYROID_DISEASE                                           | 0.5607 | 1.6836 | 0.0087 | 0.1146 |
| REACTOME_CELL_SURFACE_INTERACTIONS_AT_THE_VASCULAR_WALL                   | 0.5240 | 1.7151 | 0.0017 | 0.1215 |
| REACTOME_FORMATION_OF_TUBULIN_FOLDING_INTERMEDIATES_BY_CCT_TRIC           | 0.7002 | 1.7163 | 0.0115 | 0.1306 |
| KEGG_CARDIAC_MUSCLE_CONTRACTION                                           | 0.5395 | 1.7284 | 0.0017 | 0.0890 |
| REACTOME_COLLAGEN_FORMATION                                               | 0.5672 | 1.7479 | 0.0035 | 0.1036 |
| REACTOME_TRANSFERRIN_ENDOCYTOSIS_AND_RECYCLING                            | 0.6590 | 1.7490 | 0.0038 | 0.1129 |
| REACTOME_LATENT_INFECTION_OF_HOMO_SAPIENS_WITH_MYCOBACTERIUM_TUBERCULOSIS | 0.6472 | 1.7684 | 0.0037 | 0.1045 |
| REACTOME_MUSCLE_CONTRACTION                                               | 0.5923 | 1.7753 | 0.0037 | 0.1076 |
| REACTOME_INTERFERON_ALPHA_BETA_SIGNALING                                  | 0.5767 | 1.7913 | 0.0053 | 0.1032 |
| REACTOME_POST_CHAPERONIN_TUBULIN_FOLDING_PATHWAY                          | 0.7479 | 1.8111 | 0.0079 | 0.0954 |
| REACTOME_GLYCOSPHINGOLIPID_METABOLISM                                     | 0.6343 | 1.8299 | 0.0019 | 0.0902 |
| KEGG_HYPERTROPHIC_CARDIOMYOPATHY_HCM                                      | 0.5537 | 1.8327 | 0.0000 | 0.0292 |
| KEGG_ARRHYTHMOGENIC_RIGHT_VENTRICULAR_CARDIOMYOPATHY_ARVC                 | 0.5605 | 1.8376 | 0.0000 | 0.0372 |
| KEGG_HEMATOPOIETIC_CELL_LINEAGE                                           | 0.5552 | 1.8569 | 0.0000 | 0.0423 |
| KEGG_ECM_RECEPTOR_INTERACTION                                             | 0.5811 | 1.9147 | 0.0017 | 0.0348 |
| REACTOME_DEGRADATION_OF_THE_EXTRACELLULAR_MATRIX                          | 0.7120 | 1.9362 | 0.0000 | 0.0257 |
| REACTOME_INTEGRIN_CELL_SURFACE_INTERACTIONS                               | 0.5901 | 1.9637 | 0.0000 | 0.0208 |
| REACTOME_SMOOTH_MUSCLE_CONTRACTION                                        | 0.7577 | 2.0060 | 0.0000 | 0.0158 |
| REACTOME_EXTRACELLULAR_MATRIX_ORGANIZATION                                | 0.6051 | 2.0093 | 0.0000 | 0.0292 |

**Table S1A: Top up and down regulated GSEA REACTOME and KEGG pathways by 5-AZA treatment in H460 cells.** GSEA pathway cut-off of FDR  $\leq 0.250$  was used to delineate pathways with significant enrichment by 5-AZA. ES=Enrichment Score, NES=Normalized Enrichment Score, NOM p-Value= Nominal p Value, FDR q Value= False Discover Rate q Value.

| A549 5-AZA Enriched Pathways                                                             | ES     | NES    | NOM p-val | FDR q-val |
|------------------------------------------------------------------------------------------|--------|--------|-----------|-----------|
| REACTOME_CELL_CYCLE_MITOTIC                                                              | -0.550 | -2.448 | 0.000     | 0.000     |
| REACTOME_DNA_REPLICATION                                                                 | -0.574 | -2.400 | 0.000     | 0.000     |
| REACTOME_G2_M_CHECKPOINTS                                                                | -0.739 | -2.386 | 0.000     | 0.000     |
| REACTOME_ACTIVATION_OF_THE_PRE_REPLICATIVE_COMPLEX                                       | -0.769 | -2.367 | 0.000     | 0.000     |
| REACTOME_EXTENSION_OF_TELOMERES                                                          | -0.792 | -2.339 | 0.000     | 0.000     |
| REACTOME_DNA_STRAND_ELONGATION                                                           | -0.759 | -2.337 | 0.000     | 0.000     |
| REACTOME_MITOTIC_M_M_G1_PHASES                                                           | -0.563 | -2.312 | 0.000     | 0.000     |
| REACTOME_MITOTIC_PROMETAPHASE                                                            | -0.610 | -2.304 | 0.000     | 0.000     |
| REACTOME_ACTIVATION_OF_ATR_IN_RESPONSE_TO_REPLICATION_STRESS                             | -0.741 | -2.304 | 0.000     | 0.000     |
| KEGG_MISMATCH_REPAIR                                                                     | -0.803 | -2.271 | 0.000     | 0.000     |
| KEGG_DNA_REPLICATION                                                                     | -0.723 | -2.264 | 0.000     | 0.000     |
| REACTOME_CELL_CYCLE                                                                      | -0.494 | -2.243 | 0.000     | 0.000     |
| KEGG_CELL_CYCLE                                                                          | -0.556 | -2.206 | 0.000     | 0.000     |
| REACTOME_LAGGING_STRAND_SYNTHESIS                                                        | -0.801 | -2.200 | 0.000     | 0.000     |
| REACTOME_E2F_MEDIATED_REGULATION_OF_DNA_REPLICATION                                      | -0.704 | -2.183 | 0.000     | 0.000     |
| REACTOME_INTERACTIONS_OF_VPR_WITH_HOST_CELLULAR_PROTEINS                                 | -0.703 | -2.169 | 0.000     | 0.000     |
| REACTOME_GLOBAL_GENOMIC_NER_GG_NER                                                       | -0.703 | -2.135 | 0.000     | 0.000     |
| REACTOME_G1_S_TRANSITION                                                                 | -0.543 | -2.133 | 0.000     | 0.000     |
| REACTOME_MITOTIC_G1_G1_S_PHASES                                                          | -0.533 | -2.120 | 0.000     | 0.000     |
| REACTOME_S_PHASE                                                                         | -0.548 | -2.115 | 0.000     | 0.000     |
| KEGG_NUCLEOTIDE_EXCISION_REPAIR                                                          | -0.640 | -2.113 | 0.000     | 0.000     |
| REACTOME_DNA_REPAIR                                                                      | -0.536 | -2.087 | 0.000     | 0.000     |
| REACTOME_PROCESSIVE_SYNTHESIS_ON_THE_LAGGING_STRAND                                      | -0.807 | -2.080 | 0.000     | 0.000     |
| REACTOME_CELL_CYCLE_CHECKPOINTS                                                          | -0.536 | -2.068 | 0.000     | 0.000     |
| REACTOME_SYNTHESIS_OF_DNA                                                                | -0.543 | -2.051 | 0.000     | 0.000     |
| REACTOME_CYTOSOLIC_TRNA_AMINOACYLATION                                                   | -0.698 | -2.023 | 0.000     | 0.001     |
| REACTOME_METABOLISM_OF_NON_CODING_RNA                                                    | -0.605 | -2.012 | 0.000     | 0.001     |
| REACTOME_TRNA_AMINOACYLATION                                                             | -0.622 | -1.998 | 0.000     | 0.001     |
| REACTOME_TRANSPORT_OF_RIBONUCLEOPROTEINS_INTO_THE_HOST_NUCLEUS                           | -0.676 | -1.987 | 0.000     | 0.002     |
| REACTOME_G0_AND_EARLY_G1                                                                 | -0.699 | -1.977 | 0.000     | 0.002     |
| REACTOME_NUCLEOTIDE_EXCISION_REPAIR                                                      | -0.591 | -1.976 | 0.000     | 0.002     |
| REACTOME_HOMOLOGOUS_RECOMBINATION_REPAIR_OF_REPLICATION_INDEPENDENT_DOUBLE_STRAND_BREAKS | -0.742 | -1.958 | 0.000     | 0.002     |
| REACTOME_MITOTIC_G2_G2_M_PHASES                                                          | -0.535 | -1.947 | 0.002     | 0.003     |
| REACTOME_REGULATION_OF_GLUKOKINASE_BY_GLUKOKINASE_REGULATORY_PROTEIN                     | -0.653 | -1.947 | 0.000     | 0.003     |
| KEGG_SPLICEOSOME                                                                         | -0.490 | -1.934 | 0.000     | 0.003     |
| KEGG_AMINOACYL_TRNA_BIOSYNTHESIS                                                         | -0.596 | -1.929 | 0.000     | 0.003     |
| KEGG_HOMOLOGOUS_RECOMBINATION                                                            | -0.639 | -1.910 | 0.004     | 0.003     |
| REACTOME_PROCESSING_OF_CAPPED_INTRON_CONTAINING_PRE_MRNA                                 | -0.472 | -1.908 | 0.000     | 0.004     |
| REACTOME_G1_S_SPECIFIC_TRANSCRIPTION                                                     | -0.724 | -1.908 | 0.000     | 0.004     |
| KEGG_BUTANOATE_METABOLISM                                                                | -0.607 | -1.904 | 0.000     | 0.003     |
| REACTOME_TRANSCRIPTION_COUPLED_NER_TC_NER                                                | -0.582 | -1.895 | 0.000     | 0.005     |
| REACTOME_CHROMOSOME_MAINTENANCE                                                          | -0.484 | -1.895 | 0.000     | 0.004     |
| REACTOME_MRNA_PROCESSING                                                                 | -0.463 | -1.894 | 0.000     | 0.004     |
| REACTOME_M_G1_TRANSITION                                                                 | -0.514 | -1.888 | 0.000     | 0.005     |
| REACTOME_NEP_NS2_INTERACTS_WITH_THE_CELLULAR_EXPORT_MACHINERY                            | -0.629 | -1.875 | 0.000     | 0.006     |
| REACTOME_DOUBLE_STRAND_BREAK_REPAIR                                                      | -0.674 | -1.863 | 0.002     | 0.007     |

|                                                                                                                                          |        |        |       |       |
|------------------------------------------------------------------------------------------------------------------------------------------|--------|--------|-------|-------|
| REACTOME_TRANSPORT_OF_MATURE_TRANSCRIPT_TO_CYTOPLASM                                                                                     | -0.548 | -1.855 | 0.000 | 0.007 |
| KEGG_BASE_EXCISION_REPAIR                                                                                                                | -0.590 | -1.853 | 0.002 | 0.005 |
| REACTOME_TRANSPORT_OF_MATURE_MRNA_DERIVED_FROM_AN_INTRONLESS_TRANSCRIPT                                                                  | -0.602 | -1.846 | 0.004 | 0.008 |
| REACTOME_LOSS_OF_NLP_FROM_MITOTIC_CENTROSOMES                                                                                            | -0.548 | -1.842 | 0.000 | 0.008 |
| KEGG_PYRIMIDINE_METABOLISM                                                                                                               | -0.474 | -1.793 | 0.000 | 0.011 |
| REACTOME_DEADENYLATION_OF_MRNA                                                                                                           | -0.650 | -1.792 | 0.008 | 0.014 |
| REACTOME_RECRUITMENT_OF_MITOTIC_CENTROSOME_PROTEINS_AND_COMPLEXES                                                                        | -0.523 | -1.792 | 0.000 | 0.014 |
| KEGG_ONE_CARBON_POOL_BY_FOLATE                                                                                                           | -0.678 | -1.787 | 0.010 | 0.011 |
| KEGG_PURINE_METABOLISM                                                                                                                   | -0.439 | -1.785 | 0.000 | 0.011 |
| KEGG_PROGESTERONE_MEDIATED_OOCYTE_MATURATION                                                                                             | -0.480 | -1.765 | 0.000 | 0.011 |
| REACTOME_REGULATION_OF_BETA_CELL_DEVELOPMENT                                                                                             | -0.577 | -1.750 | 0.006 | 0.023 |
| REACTOME_GRB2_SOS_PROVIDES_LINKAGE_TO_MAPK_SIGNALING_FOR_INTERGRINS_                                                                     | -0.676 | -1.746 | 0.002 | 0.023 |
| KEGG_MATURITY_ONSET_DIABETES_OF_THE_YOUNG                                                                                                | -0.595 | -1.731 | 0.004 | 0.017 |
| KEGG_PANTOTHENATE_AND_COA_BIOSYNTHESIS                                                                                                   | -0.654 | -1.726 | 0.006 | 0.016 |
| REACTOME_P130CAS_LINKAGE_TO_MAPK_SIGNALING_FOR_INTEGRINS                                                                                 | -0.674 | -1.726 | 0.006 | 0.028 |
| REACTOME_MRNA_SPLICING                                                                                                                   | -0.441 | -1.699 | 0.002 | 0.036 |
| REACTOME_AMINO_ACID_SYNTHESIS_AND_INTERCONVERSION_TRANSAMINATION                                                                         | -0.646 | -1.686 | 0.008 | 0.040 |
| REACTOME_FANCONI_ANEMIA_PATHWAY                                                                                                          | -0.608 | -1.684 | 0.008 | 0.040 |
| REACTOME_METABOLISM_OF_RNA                                                                                                               | -0.391 | -1.683 | 0.000 | 0.040 |
| REACTOME_CLEAVAGE_OF_GROWING_TRANSCRIPT_IN_THE_TERMINATION_REGION_                                                                       | -0.507 | -1.668 | 0.004 | 0.045 |
| KEGG_OOCYTE_MEIOSIS                                                                                                                      | -0.428 | -1.656 | 0.007 | 0.031 |
| REACTOME_ADHERENS_JUNCTIONS_INTERACTIONS                                                                                                 | -0.544 | -1.646 | 0.015 | 0.054 |
| REACTOME_CYCLIN_A_B1_ASSOCIATED_EVENTS_DURING_G2_M_TRANSITION                                                                            | -0.636 | -1.639 | 0.024 | 0.057 |
| REACTOME_SYNTHESIS_OF_PIPS_AT_THE_GOLGI_MEMBRANE                                                                                         | -0.624 | -1.638 | 0.008 | 0.056 |
| REACTOME_HIV_LIFE_CYCLE                                                                                                                  | -0.416 | -1.629 | 0.002 | 0.061 |
| REACTOME_SIGNALLING_TO_ERKS                                                                                                              | -0.515 | -1.626 | 0.011 | 0.062 |
| KEGG_TERPENOID_BACKBONE_BIOSYNTHESIS                                                                                                     | -0.620 | -1.625 | 0.010 | 0.041 |
| REACTOME_KINESINS                                                                                                                        | -0.574 | -1.624 | 0.006 | 0.062 |
| REACTOME_REGULATION_OF_GENE_EXPRESSION_IN_BETA_CELLS                                                                                     | -0.591 | -1.622 | 0.021 | 0.062 |
| KEGG_VALINE_LEUCINE_AND_ISOLEUCINE_DEGRADATION                                                                                           | -0.489 | -1.610 | 0.010 | 0.045 |
| KEGG_WNT_SIGNALING_PATHWAY                                                                                                               | -0.391 | -1.608 | 0.000 | 0.044 |
| REACTOME_APC_CDC20_MEDIATED_DEGRADATION_OF_NEK2A                                                                                         | -0.573 | -1.607 | 0.011 | 0.070 |
| REACTOME_TELOMERE_MAINTENANCE                                                                                                            | -0.441 | -1.604 | 0.007 | 0.070 |
| REACTOME_FORMATION_OF_INCISION_COMPLEX_IN_GG_NER                                                                                         | -0.581 | -1.602 | 0.018 | 0.071 |
| REACTOME_MITOCHONDRIAL_PROTEIN_IMPORT                                                                                                    | -0.468 | -1.595 | 0.013 | 0.073 |
| KEGG_PYRUVATE_METABOLISM                                                                                                                 | -0.499 | -1.592 | 0.012 | 0.048 |
| REACTOME_DEADENYLATION_DEPENDENT_MRNA_DECAY                                                                                              | -0.472 | -1.592 | 0.019 | 0.074 |
| REACTOME_PROCESSING_OF_CAPPED_INTRONLESS_PRE_MRNA                                                                                        | -0.563 | -1.584 | 0.018 | 0.079 |
| REACTOME_PLATELET_SENSITIZATION_BY_LDL                                                                                                   | -0.605 | -1.575 | 0.038 | 0.084 |
| REACTOME_NOTCH1_INTRACELLULAR_DOMAIN_REGULATES_TRANSCRIPTION                                                                             | -0.485 | -1.575 | 0.012 | 0.083 |
| REACTOME_G1_PHASE                                                                                                                        | -0.500 | -1.568 | 0.023 | 0.087 |
| REACTOME_INHIBITION_OF_THE_PROTEOLYTIC_ACTIVITY_OF_APC_C_REQUIRED_FOR_THE_ONSET_OF_ANAPHASE_BY_MITOTIC_SPIN<br>DLE_CHECKPOINT_COMPONENTS | -0.571 | -1.566 | 0.027 | 0.087 |
| REACTOME_REGULATION_OF_MITOTIC_CELL_CYCLE                                                                                                | -0.428 | -1.565 | 0.009 | 0.087 |
| REACTOME_BASE_EXCISION_REPAIR                                                                                                            | -0.573 | -1.562 | 0.032 | 0.087 |
| REACTOME_RNA_POL_II_TRANSCRIPTION                                                                                                        | -0.396 | -1.561 | 0.005 | 0.087 |
| REACTOME_CTLA4_INHIBITORY_SIGNALING                                                                                                      | -0.545 | -1.558 | 0.029 | 0.088 |

|                                                                                                                |        |        |       |       |
|----------------------------------------------------------------------------------------------------------------|--------|--------|-------|-------|
| REACTOME_PI3K_CASCADE                                                                                          | -0.426 | -1.544 | 0.007 | 0.098 |
| REACTOME_MITOCHONDRIAL_TRNA_AMINOACYLATION                                                                     | -0.560 | -1.531 | 0.044 | 0.108 |
| REACTOME_HOST_INTERACTIONS_OF_HIV_FACTORS                                                                      | -0.389 | -1.530 | 0.002 | 0.108 |
| KEGG_PROXIMAL_TUBULE_BICARBONATE_RECLAMATION                                                                   | -0.536 | -1.525 | 0.044 | 0.084 |
| REACTOME_ACTIVATION_OF_THE_MRNA_UPON_BINDING_OF_THE_CAP_BINDING_COMPLEX_AND_EIFS_AND_SUBSEQUENT_BINDING_TO_43S | -0.436 | -1.524 | 0.016 | 0.111 |
| REACTOME_HIV_INFECTION                                                                                         | -0.356 | -1.502 | 0.000 | 0.130 |
| REACTOME_INSULIN_RECEPTOR_SIGNALLING_CASCADE                                                                   | -0.402 | -1.499 | 0.013 | 0.132 |
| REACTOME_DESTABILIZATION_OF_MRNA_BY_KSRP                                                                       | -0.576 | -1.494 | 0.052 | 0.135 |
| REACTOME_NUCLEAR_RECEPTOR_TRANSCRIPTION_PATHWAY                                                                | -0.438 | -1.489 | 0.027 | 0.139 |
| KEGG_COLORECTAL_CANCER                                                                                         | -0.419 | -1.489 | 0.013 | 0.107 |
| REACTOME_ACTIVATION_OF_BH3_ONLY_PROTEINS                                                                       | -0.575 | -1.482 | 0.047 | 0.145 |
| REACTOME_RESOLUTION_OF_AP_SITES_VIA_THE_MULTIPLE_NUCLEOTIDE_PATCH_REPLACEMENT_PATHWAY                          | -0.558 | -1.480 | 0.069 | 0.145 |
| REACTOME_SIGNALING_BY_NOTCH                                                                                    | -0.388 | -1.476 | 0.015 | 0.147 |
| REACTOME_ANTIVIRAL_MECHANISM_BY_IFN_STIMULATED_GENES                                                           | -0.412 | -1.475 | 0.023 | 0.147 |
| REACTOME_CITRIC_ACID_CYCLE_TCA_CYCLE                                                                           | -0.543 | -1.472 | 0.049 | 0.147 |
| REACTOME_INTEGRIN_ALPHA11B_BETA3_SIGNALING                                                                     | -0.491 | -1.471 | 0.033 | 0.147 |
| REACTOME_PHOSPHORYLATION_OF_THE_APC_C                                                                          | -0.546 | -1.469 | 0.071 | 0.147 |
| REACTOME_SIGNALING_BY_CONSTITUTIVELY_ACTIVE_EGFR                                                               | -0.541 | -1.466 | 0.049 | 0.149 |
| KEGG_HEDGEHOG_SIGNALING_PATHWAY                                                                                | -0.426 | -1.462 | 0.036 | 0.127 |
| REACTOME_DARPP_32_EVENTS                                                                                       | -0.511 | -1.461 | 0.051 | 0.152 |
| REACTOME_L1CAM_INTERACTIONS                                                                                    | -0.392 | -1.461 | 0.020 | 0.151 |
| REACTOME_SIGNALING_BY_NOTCH1                                                                                   | -0.404 | -1.460 | 0.033 | 0.150 |
| REACTOME_PKB_MEDIATED_EVENTS                                                                                   | -0.482 | -1.457 | 0.042 | 0.152 |
| REACTOME_MYOGENESIS                                                                                            | -0.486 | -1.452 | 0.054 | 0.155 |
| REACTOME_SIGNALLING_TO_RAS                                                                                     | -0.490 | -1.452 | 0.066 | 0.154 |
| REACTOME_ASSEMBLY_OF_THE_PRE_REPLICATIVE_COMPLEX                                                               | -0.411 | -1.451 | 0.033 | 0.153 |
| REACTOME_PLC_BETA_MEDIATED_EVENTS                                                                              | -0.443 | -1.449 | 0.041 | 0.154 |
| KEGG_TGF_BETA_SIGNALING_PATHWAY                                                                                | -0.384 | -1.448 | 0.015 | 0.136 |
| REACTOME_METABOLISM_OF_MRNA                                                                                    | -0.345 | -1.448 | 0.002 | 0.154 |
| KEGG_LYSINE_DEGRADATION                                                                                        | -0.441 | -1.445 | 0.036 | 0.133 |
| REACTOME_SIGNALING_BY_FGFR_MUTANTS                                                                             | -0.441 | -1.443 | 0.030 | 0.157 |
| REACTOME_APOPTOTIC_CLEAVAGE_OF_CELLULAR_PROTEINS                                                               | -0.453 | -1.440 | 0.041 | 0.159 |
| KEGG_CHRONIC_MYELOID_LEUKEMIA                                                                                  | -0.402 | -1.437 | 0.025 | 0.135 |
| REACTOME_SIGNAL_AMPLIFICATION                                                                                  | -0.466 | -1.433 | 0.056 | 0.165 |
| REACTOME_ANTIGEN_ACTIVATES_B_CELL_RECEPTOR_LEADING_TO_GENERATION_OF_SECOND_MESSENGERS                          | -0.473 | -1.418 | 0.068 | 0.181 |
| REACTOME_CD28_CO_STIMULATION                                                                                   | -0.471 | -1.415 | 0.048 | 0.183 |
| REACTOME_INSULIN_SYNTHESIS_AND_PROCESSING                                                                      | -0.503 | -1.412 | 0.090 | 0.185 |
| KEGG_ENDOMETRIAL_CANCER                                                                                        | -0.417 | -1.408 | 0.052 | 0.160 |
| REACTOME_SIGNALLING_BY_NGF                                                                                     | -0.327 | -1.406 | 0.003 | 0.192 |
| KEGG_BETA_ALANINE_METABOLISM                                                                                   | -0.495 | -1.402 | 0.079 | 0.161 |
| REACTOME_LATE_PHASE_OF_HIV_LIFE_CYCLE                                                                          | -0.368 | -1.402 | 0.022 | 0.194 |
| REACTOME_DEVELOPMENTAL_BIOLOGY                                                                                 | -0.312 | -1.398 | 0.000 | 0.198 |
| REACTOME_ORC1_REMOVAL_FROM_CHROMATIN                                                                           | -0.388 | -1.378 | 0.036 | 0.223 |
| KEGG_PANCREATIC_CANCER                                                                                         | -0.379 | -1.377 | 0.039 | 0.183 |
| REACTOME_DEPOSITION_OF_NEW_CENPA_CONTAINING_NUCLEOSOMES_AT_THE_CENTROMERE                                      | -0.393 | -1.377 | 0.049 | 0.222 |
| REACTOME_IL_3_5_AND_GM-CSF_SIGNALING                                                                           | -0.415 | -1.377 | 0.063 | 0.220 |

|                                                                                |        |        |       |       |
|--------------------------------------------------------------------------------|--------|--------|-------|-------|
| REACTOME_NGF_SIGNALLING_VIA_TRKA_FROM_THE_PLASMA_MEMBRANE                      | -0.339 | -1.368 | 0.024 | 0.230 |
| REACTOME_PRE_NOTCH_TRANSCRIPTION_AND_TRANSLATION                               | -0.475 | -1.367 | 0.092 | 0.230 |
| REACTOME_SIGNALING_BY_FGFR                                                     | -0.350 | -1.365 | 0.036 | 0.232 |
| REACTOME_MRNA_SPLICING_MINOR_PATHWAY                                           | -0.415 | -1.363 | 0.068 | 0.232 |
| KEGG_PROANOATE_METABOLISM                                                      | -0.450 | -1.362 | 0.093 | 0.196 |
| REACTOME_3_UTR_MEDIATED_TRANSLATIONAL_REGULATION                               | -0.346 | -1.362 | 0.039 | 0.231 |
| REACTOME_RNA_POL_I_TRANSCRIPTION_INITIATION                                    | -0.477 | -1.360 | 0.093 | 0.232 |
| REACTOME_BOTULINUM_NEUROTOXICITY                                               | -0.499 | -1.359 | 0.083 | 0.231 |
| REACTOME_APC_C_CDC20_MEDIATED_DEGRADATION_OF_CYCLIN_B                          | -0.503 | -1.359 | 0.111 | 0.229 |
| REACTOME_APC_C_CDC20_MEDIATED_DEGRADATION_OF_MITOTIC_PROTEINS                  | -0.380 | -1.358 | 0.058 | 0.228 |
| REACTOME_GAB1_SIGNALOSOME                                                      | -0.419 | -1.358 | 0.075 | 0.227 |
| REACTOME_CYCLIN_E_ASSOCIATED_EVENTS_DURING_G1_S_TRANSITION                     | -0.381 | -1.357 | 0.062 | 0.226 |
| REACTOME_MRNA_3_END_PROCESSING                                                 | -0.425 | -1.352 | 0.086 | 0.230 |
| REACTOME_SIGNALING_BY_ERBB4                                                    | -0.351 | -1.343 | 0.041 | 0.242 |
| REACTOME_OPIOID_SIGNALLING                                                     | -0.372 | -1.342 | 0.048 | 0.241 |
| REACTOME_NEGATIVE_REGULATION_OF_FGFR_SIGNALING                                 | -0.426 | -1.338 | 0.101 | 0.245 |
| REACTOME_N_GLYCAN_ANTENNAE_ELONGATION_IN_THE_MEDIAL_TRANS_GOLGI                | -0.502 | -1.338 | 0.119 | 0.244 |
| KEGG_GLYCINE_SERINE_AND_THREONINE_METABOLISM                                   | -0.432 | -1.337 | 0.107 | 0.224 |
| REACTOME_SIGNALING_BY_ERBB2                                                    | -0.350 | -1.337 | 0.043 | 0.243 |
| KEGG_CITRATE_CYCLE_TCA_CYCLE                                                   | -0.436 | -1.334 | 0.125 | 0.220 |
| REACTOME_ABC_FAMILY_PROTEINS_MEDIATED_TRANSPORT                                | -0.424 | -1.334 | 0.083 | 0.245 |
| REACTOME_INFLUENZA_LIFE_CYCLE                                                  | -0.336 | -1.332 | 0.029 | 0.247 |
| REACTOME_INTRINSIC_PATHWAY_FOR_APOPTOSIS                                       | -0.447 | -1.332 | 0.101 | 0.245 |
| REACTOME_REGULATION_OF_SIGNALING_BY_CBL                                        | -0.493 | -1.328 | 0.129 | 0.249 |
| REACTOME_SIGNALING_BY_EGFR_IN_CANCER                                           | -0.344 | -1.327 | 0.055 | 0.248 |
| KEGG_PPAR_SIGNALING_PATHWAY                                                    | -0.363 | -1.320 | 0.084 | 0.233 |
| KEGG_BASAL_CELL_CARCINOMA                                                      | -0.388 | -1.318 | 0.096 | 0.228 |
| KEGG_THYROID_CANCER                                                            | -0.437 | -1.318 | 0.113 | 0.222 |
| KEGG_NICOTINATE_AND_NICOTINAMIDE_METABOLISM                                    | -0.459 | -1.310 | 0.117 | 0.227 |
| KEGG_MTOR_SIGNALING_PATHWAY                                                    | -0.383 | -1.302 | 0.104 | 0.231 |
| KEGG_STEROID_HORMONE_BIOSYNTHESIS                                              | 0.472  | 1.460  | 0.053 | 0.231 |
| KEGG_CELL_ADHESION_MOLECULES_CAMS                                              | 0.402  | 1.499  | 0.022 | 0.191 |
| KEGG_SPHINGOLIPID_METABOLISM                                                   | 0.497  | 1.500  | 0.055 | 0.201 |
| KEGG_CYTOSOLIC_DNA_SENSING_PATHWAY                                             | 0.486  | 1.512  | 0.037 | 0.196 |
| REACTOME_LIPOPROTEIN_METABOLISM                                                | 0.555  | 1.572  | 0.042 | 0.246 |
| KEGG_PORPHYRIN_AND_CHLOROPHYLL_METABOLISM                                      | 0.545  | 1.575  | 0.038 | 0.135 |
| REACTOME_BIOLOGICAL_OXIDATIONS                                                 | 0.435  | 1.602  | 0.003 | 0.212 |
| REACTOME_TAK1_ACTIVATES_NFKB_BY_PHOSPHORYLATION_AND_ACTIVATION_OF_IKKS_COMPLEX | 0.602  | 1.606  | 0.029 | 0.217 |
| REACTOME_MYD88_MAL_CASCADE_INITIATED_ON_PLASMA_MEMBRANE                        | 0.480  | 1.614  | 0.013 | 0.217 |
| REACTOME_TRAF6_MEDIATED_NFKB_ACTIVATION                                        | 0.613  | 1.618  | 0.038 | 0.224 |
| REACTOME_O_LINKED_GLYCOSYLATION_OF_MUCINS                                      | 0.501  | 1.634  | 0.015 | 0.213 |
| KEGG_GLYCOSAMINOGLYCAN_DEGRADATION                                             | 0.615  | 1.639  | 0.029 | 0.090 |
| KEGG_AMINO_SUGAR_AND_NUCLEOTIDE_SUGAR_METABOLISM                               | 0.531  | 1.641  | 0.016 | 0.096 |
| REACTOME_LATENT_INFECTION_OF_HOMO_SAPIENS_WITH_MYCOBACTERIUM_TUBERCULOSIS      | 0.582  | 1.650  | 0.015 | 0.202 |
| KEGG_DRUG_METABOLISM_CYTOCHROME_P450                                           | 0.509  | 1.654  | 0.015 | 0.093 |
| REACTOME_INTERFERON_SIGNALING                                                  | 0.448  | 1.675  | 0.002 | 0.181 |
| REACTOME_INNATE_IMMUNE_SYSTEM                                                  | 0.411  | 1.675  | 0.000 | 0.195 |

|                                                                                   |       |       |       |       |
|-----------------------------------------------------------------------------------|-------|-------|-------|-------|
| KEGG_ANTIGEN_PROCESSING_AND_PRESENTATION                                          | 0.494 | 1.685 | 0.004 | 0.079 |
| REACTOME_COLLAGEN_FORMATION                                                       | 0.525 | 1.691 | 0.008 | 0.185 |
| REACTOME_EXTRACELLULAR_MATRIX_ORGANIZATION                                        | 0.490 | 1.692 | 0.003 | 0.201 |
| REACTOME_PHASE_II_CONJUGATION                                                     | 0.520 | 1.698 | 0.009 | 0.212 |
| REACTOME_TERMINATION_OF_O_GLYCAN_BIOSYNTHESIS                                     | 0.648 | 1.707 | 0.012 | 0.219 |
| REACTOME_INTEGRIN_CELL_SURFACE_INTERACTIONS                                       | 0.504 | 1.717 | 0.000 | 0.231 |
| KEGG_STARCH_AND_SUCROSE_METABOLISM                                                | 0.574 | 1.722 | 0.004 | 0.064 |
| KEGG_O_GLYCAN_BIOSYNTHESIS                                                        | 0.606 | 1.732 | 0.022 | 0.064 |
| KEGG_GLYCOSPHINGOLIPID_BIOSYNTHESIS_GANGLIO_SERIES                                | 0.697 | 1.752 | 0.010 | 0.061 |
| KEGG_ASCORBATE_AND_ALDARATE_METABOLISM                                            | 0.726 | 1.758 | 0.014 | 0.067 |
| KEGG_PENTOSE_AND_GLUCURONATE_INTERCONVERSIONS                                     | 0.677 | 1.765 | 0.015 | 0.074 |
| KEGG_ECM_RECEPTOR_INTERACTION                                                     | 0.512 | 1.772 | 0.000 | 0.084 |
| KEGG_COMPLEMENT_AND_COAGULATION_CASCADES                                          | 0.533 | 1.800 | 0.000 | 0.082 |
| KEGG_RETINOL_METABOLISM                                                           | 0.585 | 1.857 | 0.002 | 0.061 |
| REACTOME_INTERFERON_GAMMA_SIGNALING                                               | 0.580 | 1.887 | 0.000 | 0.115 |
| REACTOME_IMMUNOREGULATORY_INTERACTIONS_BETWEEN_A_LYMPHOID_AND_A_NON_LYMPHOID_CELL | 0.578 | 1.889 | 0.000 | 0.166 |
| KEGG_DRUG_METABOLISM_OTHER_ENZYMES                                                | 0.621 | 1.933 | 0.005 | 0.042 |
| KEGG_LYSOSOME                                                                     | 0.564 | 2.087 | 0.000 | 0.007 |
| REACTOME_INTERFERON_ALPHA_BETA_SIGNALING                                          | 0.737 | 2.393 | 0.000 | 0.000 |

**Table S1C: Top up and down regulated GSEA REACTOME and KEGG pathways by 5-AZA treatment in A549 cells.** GSEA pathway cut-off of FDR  $\leq 0.250$  was used to delineate pathways with significant enrichment by 5-AZA. ES=Enrichment Score, NES=Normalized Enrichment Score, NOM p-Value= Nominal p Value, FDR q Value= False Discover Rate q Value.



| H23 5-AZA Enriched Pathways                                                  | ES     | NES    | NOM p-val | FDR q-val |
|------------------------------------------------------------------------------|--------|--------|-----------|-----------|
| REACTOME_G1_S_TRANSITION                                                     | -0.561 | -2.205 | 0.000     | 0.002     |
| REACTOME_S_PHASE                                                             | -0.545 | -2.120 | 0.000     | 0.003     |
| REACTOME_M_G1_TRANSITION                                                     | -0.558 | -2.048 | 0.000     | 0.006     |
| REACTOME_SYNTHESIS_OF_DNA                                                    | -0.539 | -2.036 | 0.000     | 0.005     |
| REACTOME_INTERACTIONS_OF_VPR_WITH_HOST_CELLULAR_PROTEINS                     | -0.653 | -2.019 | 0.000     | 0.004     |
| REACTOME_DNA_REPLICATION                                                     | -0.483 | -2.019 | 0.000     | 0.004     |
| REACTOME_FATTY_ACYL_COA_BIOSYNTHESIS                                         | -0.745 | -2.018 | 0.000     | 0.003     |
| REACTOME_CELL_CYCLE_CHECKPOINTS                                              | -0.513 | -2.002 | 0.000     | 0.004     |
| REACTOME_E2F_MEDIATED_REGULATION_OF_DNA_REPLICATION                          | -0.638 | -1.974 | 0.000     | 0.005     |
| REACTOME_MITOTIC_M_M_G1_PHASES                                               | -0.473 | -1.968 | 0.000     | 0.006     |
| REACTOME_ACTIVATION_OF_ATR_IN_RESPONSE_TO_REPLICATION_STRESS                 | -0.620 | -1.962 | 0.000     | 0.006     |
| REACTOME_TRANSPORT_OF_MATURE_TRANSCRIPT_TO_CYTOPLASM                         | -0.563 | -1.947 | 0.000     | 0.006     |
| KEGG_SPLICEOSOME                                                             | -0.496 | -1.941 | 0.000     | 0.011     |
| REACTOME_PKA_MEDIATED_PHOSPHORYLATION_OF_CREB                                | -0.734 | -1.931 | 0.000     | 0.007     |
| REACTOME_ASPARAGINE_N_LINKED_GLYCOSYLATION                                   | -0.527 | -1.931 | 0.000     | 0.007     |
| REACTOME_ACTIVATION_OF_THE_PRE_REPLICATIVE_COMPLEX                           | -0.645 | -1.931 | 0.002     | 0.006     |
| REACTOME_TRANSPORT_OF_RIBONUCLEOPROTEINS_INTO_THE_HOST_NUCLEUS               | -0.632 | -1.919 | 0.000     | 0.007     |
| REACTOME_ASSEMBLY_OF_THE_PRE_REPLICATIVE_COMPLEX                             | -0.540 | -1.917 | 0.000     | 0.007     |
| REACTOME_MITOTIC_G1_G1_S_PHASES                                              | -0.480 | -1.914 | 0.000     | 0.006     |
| REACTOME_MRNA_PROCESSING                                                     | -0.461 | -1.905 | 0.000     | 0.006     |
| REACTOME_G2_M_CHECKPOINTS                                                    | -0.590 | -1.901 | 0.000     | 0.007     |
| REACTOME_CHOLESTEROL_BIOSYNTHESIS                                            | -0.667 | -1.881 | 0.002     | 0.009     |
| REACTOME_HOST_INTERACTIONS_OF_HIV_FACTORS                                    | -0.479 | -1.874 | 0.000     | 0.009     |
| REACTOME_CDT1_ASSOCIATION_WITH_THE_CDC6_ORC_ORIGIN_COMPLEX                   | -0.534 | -1.869 | 0.000     | 0.009     |
| REACTOME_CELL_CYCLE_MITOTIC                                                  | -0.419 | -1.862 | 0.000     | 0.010     |
| KEGG_MISMATCH_REPAIR                                                         | -0.651 | -1.852 | 0.000     | 0.023     |
| REACTOME_NEP_NS2_INTERACTS_WITH_THE_CELLULAR_EXPORT_MACHINERY                | -0.623 | -1.845 | 0.002     | 0.012     |
| REACTOME_ORC1_REMOVAL_FROM_CHROMATIN                                         | -0.515 | -1.840 | 0.000     | 0.013     |
| REACTOME_CYCLIN_E_ASSOCIATED_EVENTS_DURING_G1_S_TRANSITION                   | -0.518 | -1.839 | 0.000     | 0.013     |
| REACTOME_PROCESSING_OF_CAPPED_INTRON_CONTAINING_PRE_MRNA                     | -0.458 | -1.824 | 0.000     | 0.015     |
| KEGG_DNA_REPLICATION                                                         | -0.584 | -1.823 | 0.002     | 0.023     |
| REACTOME_PLG_BETA_MEDIATED_EVENTS                                            | -0.554 | -1.821 | 0.002     | 0.015     |
| REACTOME_CYTOSOLIC_TRNA_AMINOACYLATION                                       | -0.635 | -1.820 | 0.002     | 0.014     |
| REACTOME_EXTENSION_OF_TELOMERES                                              | -0.597 | -1.820 | 0.006     | 0.014     |
| REACTOME_DESTABILIZATION_OF_MRNA_BY_AUF1_HNRNP_D0                            | -0.533 | -1.814 | 0.000     | 0.015     |
| REACTOME_POST_TRANSLATIONAL_PROTEIN_MODIFICATION                             | -0.431 | -1.808 | 0.000     | 0.015     |
| REACTOME_METABOLISM_OF_NON_CODING_RNA                                        | -0.539 | -1.796 | 0.004     | 0.017     |
| REACTOME_G1_S_SPECIFIC_TRANSCRIPTION                                         | -0.680 | -1.792 | 0.002     | 0.018     |
| REACTOME_DNA_STRAND_ELONGATION                                               | -0.585 | -1.783 | 0.004     | 0.019     |
| REACTOME_P53_DEPENDENT_G1_DNA_DAMAGE_RESPONSE                                | -0.509 | -1.774 | 0.004     | 0.021     |
| REACTOME_REGULATION_OF_MRNA_STABILITY_BY_PROTEINS_THAT_BIND_AU_RICH_ELEMENTS | -0.481 | -1.774 | 0.000     | 0.021     |
| REACTOME_REGULATION_OF_GLUKOKINASE_BY_GLUKOKINASE_REGULATORY_PROTEIN         | -0.595 | -1.773 | 0.000     | 0.020     |
| REACTOME_TRANSPORT_OF_MATURE_MRNA_DERIVED_FROM_AN_INTRONLESS_TRANSCRIPT      | -0.570 | -1.768 | 0.006     | 0.021     |
| REACTOME_DNA_REPAIR                                                          | -0.456 | -1.767 | 0.002     | 0.021     |
| REACTOME_P53_INDEPENDENT_G1_S_DNA_DAMAGE_CHECKPOINT                          | -0.518 | -1.764 | 0.000     | 0.021     |
| REACTOME_CA_DEPENDENT_EVENTS                                                 | -0.585 | -1.763 | 0.006     | 0.021     |

|                                                                          |        |        |       |       |
|--------------------------------------------------------------------------|--------|--------|-------|-------|
| REACTOME_METABOLISM_OF_RNA                                               | -0.404 | -1.760 | 0.000 | 0.021 |
| REACTOME_CDK_MEDIATED_PHOSPHORYLATION_AND_REMOVAL_OF_CDC6                | -0.531 | -1.760 | 0.002 | 0.021 |
| REACTOME_REGULATION_OF_MITOTIC_CELL_CYCLE                                | -0.474 | -1.752 | 0.000 | 0.022 |
| REACTOME_DAG_AND_IP3_SIGNALING                                           | -0.576 | -1.751 | 0.002 | 0.022 |
| REACTOME_MITOCHONDRIAL_PROTEIN_IMPORT                                    | -0.514 | -1.743 | 0.000 | 0.024 |
| REACTOME_CITRIC_ACID_CYCLE_TCA_CYCLE                                     | -0.632 | -1.738 | 0.004 | 0.025 |
| REACTOME_CELL_CYCLE                                                      | -0.379 | -1.734 | 0.000 | 0.026 |
| REACTOME_AUTODEGRADATION_OF_CDH1_BY_CDH1_APC_C                           | -0.488 | -1.721 | 0.007 | 0.029 |
| KEGG_CITRATE_CYCLE_TCA_CYCLE                                             | -0.564 | -1.721 | 0.008 | 0.068 |
| REACTOME_GABA_B_RECEPTOR_ACTIVATION                                      | -0.546 | -1.720 | 0.002 | 0.028 |
| REACTOME_G_ALPHA_Z_SIGNALLING_EVENTS                                     | -0.520 | -1.717 | 0.004 | 0.029 |
| REACTOME_PRE_NOTCH_TRANSCRIPTION_AND_TRANSLATION                         | -0.574 | -1.714 | 0.008 | 0.030 |
| REACTOME_SCSKP2_MEDIATED_DEGRADATION_OF_P27_P21                          | -0.504 | -1.711 | 0.004 | 0.030 |
| REACTOME_SCF_BETA_TRCP_MEDIATED_DEGRADATION_OF_EM11                      | -0.511 | -1.710 | 0.006 | 0.030 |
| REACTOME_DARPP_32_EVENTS                                                 | -0.587 | -1.704 | 0.016 | 0.031 |
| REACTOME_METABOLISM_OF_PROTEINS                                          | -0.375 | -1.703 | 0.000 | 0.031 |
| REACTOME_GLUCOSE_TRANSPORT                                               | -0.532 | -1.702 | 0.004 | 0.030 |
| REACTOME_OPIOID_SIGNALLING                                               | -0.462 | -1.700 | 0.002 | 0.030 |
| REACTOME_AUTODEGRADATION_OF_THE_E3_UBIQUITIN_LIGASE_COP1                 | -0.501 | -1.700 | 0.004 | 0.030 |
| REACTOME_NOTCH1_INTRACELLULAR_DOMAIN_REGULATES_TRANSCRIPTION             | -0.514 | -1.698 | 0.008 | 0.030 |
| KEGG_VIBRIO_CHOLERAE_INFECTION                                           | -0.493 | -1.688 | 0.006 | 0.076 |
| REACTOME_DESTABILIZATION_OF_MRNA_BY_KSRP                                 | -0.638 | -1.685 | 0.012 | 0.033 |
| REACTOME_SIGNALING_BY_ERBB2                                              | -0.439 | -1.683 | 0.000 | 0.034 |
| REACTOME_REGULATION_OF_ORNITHINE_DECARBOXYLASE_ODC                       | -0.492 | -1.682 | 0.002 | 0.033 |
| REACTOME_CIRCADIAN_REPRESSION_OF_EXPRESSION_BY_REV_ERBA                  | -0.592 | -1.680 | 0.010 | 0.033 |
| KEGG_ONE_CARBON_POOL_BY_FOLATE                                           | -0.633 | -1.680 | 0.017 | 0.069 |
| REACTOME_CLEAVAGE_OF_GROWING_TRANSCRIPT_IN_THE_TERMINATION_REGION_       | -0.508 | -1.677 | 0.006 | 0.034 |
| REACTOME_TRNA_AMINOACYLATION                                             | -0.509 | -1.676 | 0.004 | 0.034 |
| REACTOME_DEADENYLATION_OF_MRNA                                           | -0.625 | -1.676 | 0.012 | 0.033 |
| REACTOME_PROLONGED_ERK_ACTIVATION_EVENTS                                 | -0.611 | -1.675 | 0.010 | 0.033 |
| KEGG_PROTEASOME                                                          | -0.510 | -1.669 | 0.000 | 0.068 |
| KEGG_CELL_CYCLE                                                          | -0.422 | -1.667 | 0.002 | 0.060 |
| REACTOME_ACTIVATION_OF_NF_KAPPAB_IN_B_CELLS                              | -0.467 | -1.661 | 0.006 | 0.038 |
| REACTOME_APC_C_CDC20_MEDIATED_DEGRADATION_OF_MITOTIC_PROTEINS            | -0.468 | -1.657 | 0.004 | 0.039 |
| REACTOME_A_TETRASACCHARIDE_LINKER_SEQUENCE_IS_REQUIRED_FOR_GAG_SYNTHESIS | -0.563 | -1.656 | 0.010 | 0.039 |
| KEGG_PURINE_METABOLISM                                                   | -0.399 | -1.647 | 0.000 | 0.066 |
| REACTOME_PERK_REGULATED_GENE_EXPRESSION                                  | -0.548 | -1.643 | 0.016 | 0.043 |
| REACTOME_RORA_ACTIVATES_CIRCADIAN_EXPRESSION                             | -0.576 | -1.642 | 0.027 | 0.043 |
| REACTOME_AQUAPORIN_MEDIATED_TRANSPORT                                    | -0.487 | -1.641 | 0.002 | 0.042 |
| REACTOME_VIF_MEDIATED_DEGRADATION_OF_APOBEC3G                            | -0.489 | -1.639 | 0.004 | 0.043 |
| REACTOME_SIGNALING_BY_EGFR_IN_CANCER                                     | -0.418 | -1.639 | 0.005 | 0.043 |
| KEGG_N_GLYCAN_BIOSYNTHESIS                                               | -0.489 | -1.638 | 0.002 | 0.064 |
| REACTOME_UNFOLDED_PROTEIN_RESPONSE                                       | -0.449 | -1.633 | 0.000 | 0.044 |
| REACTOME_DOWNSTREAM_SIGNAL_TRANSDUCTION                                  | -0.434 | -1.633 | 0.000 | 0.044 |
| REACTOME_TRIGLYCERIDE_BIOSYNTHESIS                                       | -0.509 | -1.631 | 0.002 | 0.044 |
| REACTOME_SIGNALING_BY_THE_B_CELL_RECEPTOR_BCR                            | -0.411 | -1.623 | 0.000 | 0.047 |
| KEGG_PROGESTERONE_MEDIATED_OOCYTE_MATURATION                             | -0.432 | -1.623 | 0.000 | 0.069 |

|                                                                                                                             |        |        |       |       |
|-----------------------------------------------------------------------------------------------------------------------------|--------|--------|-------|-------|
| REACTOME_ARMS_MEDIATED_ACTIVATION                                                                                           | -0.602 | -1.622 | 0.014 | 0.047 |
| KEGG_TERPENOID_BACKBONE_BIOSYNTHESIS                                                                                        | -0.631 | -1.621 | 0.023 | 0.064 |
| KEGG_NUCLEOTIDE_EXCISION_REPAIR                                                                                             | -0.501 | -1.617 | 0.008 | 0.061 |
| REACTOME_METABOLISM_OF_MRNA                                                                                                 | -0.380 | -1.616 | 0.000 | 0.049 |
| REACTOME_SIGNALING_BY_FGFR                                                                                                  | -0.417 | -1.616 | 0.000 | 0.049 |
| REACTOME_MRNA_SPLICING                                                                                                      | -0.415 | -1.615 | 0.000 | 0.048 |
| REACTOME_APC_C_CDH1_MEDIATED_DEGRADATION_OF_CDC20_AND_OTHER_APC_C_CDH1_TARGETED_PROTEINS_IN_LATE_MITOSIS_EARLY_G1           | -0.454 | -1.609 | 0.004 | 0.050 |
| REACTOME_REGULATION_OF_WATER_BALANCE_BY_RENAL_AQUAPORINS                                                                    | -0.487 | -1.603 | 0.010 | 0.053 |
| KEGG_GLYCOSYLPHOSPHATIDYLINOSITOL_GPI_ANCHOR_BIOSYNTHESIS                                                                   | -0.550 | -1.600 | 0.024 | 0.065 |
| REACTOME_POST_TRANSLATIONAL_MODIFICATION_SYNTHESIS_OF_GPI_ANCHORED_PROTEINS                                                 | -0.544 | -1.600 | 0.016 | 0.054 |
| REACTOME_METABOLISM_OF_CARBOHYDRATES                                                                                        | -0.369 | -1.598 | 0.000 | 0.054 |
| REACTOME_SIGNALING_BY_CONSTITUTIVELY_ACTIVE_EGFR                                                                            | -0.597 | -1.591 | 0.022 | 0.057 |
| REACTOME_GLOBAL_GENOMIC_NER_GG_NER                                                                                          | -0.531 | -1.588 | 0.015 | 0.058 |
| KEGG_COLORECTAL_CANCER                                                                                                      | -0.445 | -1.585 | 0.017 | 0.070 |
| REACTOME_SIGNALING_BY_FGFR_IN_DISEASE                                                                                       | -0.397 | -1.584 | 0.000 | 0.059 |
| REACTOME_G0_AND_EARLY_G1                                                                                                    | -0.547 | -1.583 | 0.024 | 0.058 |
| REACTOME_HIV_INFECTION                                                                                                      | -0.380 | -1.582 | 0.000 | 0.059 |
| REACTOME_BIOSYNTHESIS_OF_THE_N_GLYCAN_PRECURSOR_DOLICHOL_LIPID_LINKED_OLIGOSACCHARIDE_LLO_AND_TRANSFER_TO_A_NASCENT_PROTEIN | -0.533 | -1.581 | 0.011 | 0.058 |
| REACTOME_CHONDROITIN_SULFATE_DERMATAN_SULFATE_METABOLISM                                                                    | -0.477 | -1.578 | 0.008 | 0.060 |
| REACTOME_GLUCAGON_SIGNALING_IN_METABOLIC_REGULATION                                                                         | -0.506 | -1.577 | 0.015 | 0.060 |
| KEGG_AMINOACYL_TRNA_BIOSYNTHESIS                                                                                            | -0.485 | -1.575 | 0.016 | 0.071 |
| REACTOME_DEADENYLATION_DEPENDENT_MRNA_DECAY                                                                                 | -0.478 | -1.573 | 0.016 | 0.061 |
| REACTOME_DOWNSTREAM_SIGNALING_EVENTS_OF_B_CELL_RECEPTOR_BCR                                                                 | -0.407 | -1.572 | 0.002 | 0.061 |
| REACTOME_REGULATION_OF_INSULIN_SECRETION_BY_GLUCAGON LIKE PEPTIDE1                                                          | -0.477 | -1.565 | 0.013 | 0.064 |
| REACTOME_DOWNSTREAM_SIGNALING_OF_ACTIVATED_FGFR                                                                             | -0.411 | -1.564 | 0.002 | 0.064 |
| REACTOME_ACTIVATION_OF_GENES_BY_ATF4                                                                                        | -0.540 | -1.562 | 0.023 | 0.064 |
| REACTOME_NUCLEOTIDE_EXCISION_REPAIR                                                                                         | -0.463 | -1.560 | 0.015 | 0.064 |
| REACTOME_INSULIN_SYNTHESIS_AND_PROCESSING                                                                                   | -0.560 | -1.553 | 0.031 | 0.068 |
| REACTOME_SIGNALING_BY_WNT                                                                                                   | -0.440 | -1.552 | 0.020 | 0.068 |
| KEGG_RNA_DEGRADATION                                                                                                        | -0.447 | -1.544 | 0.009 | 0.088 |
| REACTOME_RNA_POL_I_TRANSCRIPTION_INITIATION                                                                                 | -0.536 | -1.540 | 0.041 | 0.074 |
| REACTOME_PYRUVATE_METABOLISM_AND_CITRIC_ACID_TCA_CYCLE                                                                      | -0.468 | -1.534 | 0.017 | 0.077 |
| REACTOME_ZINC_TRANSPORTERS                                                                                                  | -0.587 | -1.531 | 0.056 | 0.078 |
| REACTOME_GLUCOSE_METABOLISM                                                                                                 | -0.423 | -1.523 | 0.015 | 0.082 |
| REACTOME_PHOSPHOLIPASE_C_MEDIATED_CASCADE                                                                                   | -0.444 | -1.522 | 0.010 | 0.083 |
| REACTOME_REGULATION_OF_APOPTOSIS                                                                                            | -0.437 | -1.522 | 0.008 | 0.082 |
| REACTOME_LAGGING_STRAND_SYNTHESIS                                                                                           | -0.560 | -1.521 | 0.043 | 0.081 |
| REACTOME_GLYCOLYSIS                                                                                                         | -0.513 | -1.521 | 0.033 | 0.081 |
| REACTOME_METAL_ION_SLC_TRANSPORTERS                                                                                         | -0.550 | -1.520 | 0.037 | 0.081 |
| KEGG_O_GLYCAN_BIOSYNTHESIS                                                                                                  | -0.496 | -1.519 | 0.026 | 0.105 |
| REACTOME_SIGNALING_TO_P38_VIA_RIT_AND_RIN                                                                                   | -0.593 | -1.514 | 0.048 | 0.084 |
| KEGG_LYSINE_DEGRADATION                                                                                                     | -0.455 | -1.509 | 0.021 | 0.108 |
| REACTOME_INTRINSIC_PATHWAY_FOR_APOPTOSIS                                                                                    | -0.497 | -1.509 | 0.037 | 0.086 |
| REACTOME_AMINO_ACID_SYNTHESIS_AND_INTERCONVERSION_TRANSAMINATION                                                            | -0.579 | -1.508 | 0.057 | 0.086 |
| REACTOME_TRANSCRIPTION_COUPLED_NER_TC_NER                                                                                   | -0.461 | -1.501 | 0.030 | 0.090 |

|                                                                                            |        |        |       |       |
|--------------------------------------------------------------------------------------------|--------|--------|-------|-------|
| REACTOME_NGF_SIGNALLING_VIA_TRKA_FROM_THE_PLASMA_MEMBRANE                                  | -0.371 | -1.498 | 0.005 | 0.091 |
| KEGG_GLYCOSAMINOGLYCAN_BIOSYNTHESIS_CHONDROITIN_SULFATE                                    | -0.533 | -1.498 | 0.034 | 0.113 |
| REACTOME_FATTY_ACID_TRIACYLGLYCEROL_AND_KETONE_BODY_METABOLISM                             | -0.362 | -1.493 | 0.002 | 0.094 |
| REACTOME_PRE_NOTCH_EXPRESSION_AND_PROCESSING                                               | -0.461 | -1.492 | 0.035 | 0.094 |
| REACTOME_PKB_MEDIATED_EVENTS                                                               | -0.505 | -1.487 | 0.052 | 0.097 |
| REACTOME_PI_METABOLISM                                                                     | -0.442 | -1.483 | 0.030 | 0.099 |
| KEGG_LONG_TERM_DEPRESSION                                                                  | -0.404 | -1.483 | 0.014 | 0.123 |
| REACTOME_MITOTIC_PROMETAPHASE                                                              | -0.394 | -1.481 | 0.013 | 0.100 |
| REACTOME_SIGNALING_BY_ERBB4                                                                | -0.397 | -1.480 | 0.013 | 0.099 |
| REACTOME_SIGNALING_BY_NOTCH                                                                | -0.381 | -1.478 | 0.004 | 0.100 |
| REACTOME_PROCESSING_OF_CAPPED_INTRONLESS_PRE_MRNA                                          | -0.522 | -1.471 | 0.041 | 0.104 |
| REACTOME_APOPTOSIS                                                                         | -0.365 | -1.464 | 0.010 | 0.109 |
| REACTOME_PLATELET_SENSITIZATION_BY_LDL                                                     | -0.562 | -1.464 | 0.066 | 0.108 |
| REACTOME_JNK_C_JUN_KINASES_PHOSPHORYLATION_AND_ACTIVATION_MEDIATED_BY_ACTIVATED_HUMAN_TAK1 | -0.562 | -1.460 | 0.062 | 0.110 |
| REACTOME_RNA_POL_II_TRANSCRIPTION                                                          | -0.378 | -1.452 | 0.004 | 0.116 |
| REACTOME_GLUCCONEOGENESIS                                                                  | -0.472 | -1.451 | 0.043 | 0.116 |
| REACTOME_ANTIGEN_PROCESSING_UBIQUITINATION_PROTEASOME_DEGRADATION                          | -0.344 | -1.447 | 0.000 | 0.118 |
| REACTOME_SIGNALING_BY_PDGF                                                                 | -0.370 | -1.438 | 0.011 | 0.125 |
| REACTOME_INTEGRATION_OF_ENERGY_METABOLISM                                                  | -0.361 | -1.431 | 0.011 | 0.129 |
| REACTOME_MAP_KINASE_ACTIVATION_IN_TLR_CASCADE                                              | -0.430 | -1.430 | 0.038 | 0.130 |
| KEGG_GAP_JUNCTION                                                                          | -0.383 | -1.425 | 0.024 | 0.185 |
| REACTOME_TRANSPORT_OF_VITAMINS_NUCLEOSIDES_AND_RELATED_MOLECULES                           | -0.464 | -1.416 | 0.063 | 0.142 |
| KEGG_INOSITOL_PHOSPHATE_METABOLISM                                                         | -0.414 | -1.416 | 0.035 | 0.190 |
| REACTOME_SIGNALING_TO_ERKS                                                                 | -0.446 | -1.416 | 0.033 | 0.141 |
| REACTOME_ACTIVATED_AMPK_STIMULATES_FATTY_ACID_OXIDATION_IN_MUSCLE                          | -0.531 | -1.416 | 0.064 | 0.140 |
| REACTOME_TRANSPORT_TO_THE_GOLGI_AND_SUBSEQUENT_MODIFICATION                                | -0.462 | -1.416 | 0.052 | 0.139 |
| REACTOME_CHROMOSOME_MAINTENANCE                                                            | -0.361 | -1.415 | 0.020 | 0.139 |
| REACTOME_SIGNALING_BY_NODAL                                                                | -0.518 | -1.415 | 0.077 | 0.138 |
| REACTOME_SIGNALING_BY_NGF                                                                  | -0.331 | -1.413 | 0.005 | 0.138 |
| REACTOME_ACTIVATION_OF_CHAPERONE_GENES_BY_XBP1S                                            | -0.425 | -1.411 | 0.057 | 0.139 |
| REACTOME_THROMBIN_SIGNALLING_THROUGH_PROTEINASE_ACTIVATED_RECEPTORS_PARS                   | -0.452 | -1.407 | 0.059 | 0.141 |
| REACTOME_TELOMERE_MAINTENANCE                                                              | -0.389 | -1.405 | 0.031 | 0.142 |
| REACTOME_TRANSLATION                                                                       | -0.348 | -1.404 | 0.013 | 0.142 |
| REACTOME_TRANSMEMBRANE_TRANSPORT_OF_SMALL_MOLECULES                                        | -0.307 | -1.403 | 0.000 | 0.142 |
| KEGG_PYRIMIDINE_METABOLISM                                                                 | -0.372 | -1.399 | 0.039 | 0.205 |
| KEGG_GLYCOSAMINOGLYCAN_BIOSYNTHESIS_KERATAN_SULFATE                                        | -0.537 | -1.396 | 0.083 | 0.201 |
| REACTOME_PPARA_ACTIVATES_GENE_EXPRESSION                                                   | -0.365 | -1.392 | 0.027 | 0.152 |
| REACTOME_APOPTOTIC_CLEAVAGE_OF_CELLULAR_PROTEINS                                           | -0.438 | -1.390 | 0.063 | 0.153 |
| REACTOME_METABOLISM_OF_LIPIDS_AND_LIPOPROTEINS                                             | -0.301 | -1.387 | 0.000 | 0.155 |
| REACTOME_GENERIC_TRANSCRIPTION_PATHWAY                                                     | -0.310 | -1.385 | 0.000 | 0.156 |
| REACTOME_SYNTHESIS_OF_PIPS_AT_THE_GOLGI_MEMBRANE                                           | -0.518 | -1.377 | 0.107 | 0.163 |
| REACTOME_RNA_POL_I_TRANSCRIPTION_TERMINATION                                               | -0.509 | -1.376 | 0.094 | 0.163 |
| REACTOME_SIGNALING_BY_INSULIN_RECEPTOR                                                     | -0.357 | -1.373 | 0.031 | 0.165 |
| KEGG_WNT_SIGNALING_PATHWAY                                                                 | -0.336 | -1.373 | 0.020 | 0.228 |
| REACTOME_ION_TRANSPORT_BY_P_TYPE_ATPASES                                                   | -0.448 | -1.372 | 0.074 | 0.165 |
| KEGG_ADHERENS_JUNCTION                                                                     | -0.382 | -1.372 | 0.046 | 0.221 |
| KEGG_NEUROTROPHIN_SIGNALING_PATHWAY                                                        | -0.346 | -1.368 | 0.028 | 0.219 |

|                                                                                                                |        |        |       |       |
|----------------------------------------------------------------------------------------------------------------|--------|--------|-------|-------|
| KEGG_NICOTINATE_AND_NICOTINAMIDE_METABOLISM                                                                    | -0.475 | -1.368 | 0.088 | 0.212 |
| REACTOME_CROSS_PRESENTATION_OF_SOLUBLE_EXOGENOUS_ANTIGENS_ENDOSOMES                                            | -0.415 | -1.365 | 0.061 | 0.171 |
| REACTOME_METABOLISM_OF_POLYAMINES                                                                              | -0.539 | -1.364 | 0.117 | 0.171 |
| REACTOME_HEPARAN_SULFATE_HEPARIN_HS_GAG_METABOLISM                                                             | -0.401 | -1.361 | 0.062 | 0.174 |
| KEGG_BASE_EXCISION_REPAIR                                                                                      | -0.440 | -1.360 | 0.083 | 0.215 |
| KEGG_ACUTE_MYELOID_LEUKEMIA                                                                                    | -0.387 | -1.356 | 0.068 | 0.214 |
| REACTOME_DOUBLE_STRAND_BREAK_REPAIR                                                                            | -0.475 | -1.354 | 0.115 | 0.180 |
| KEGG_THYROID_CANCER                                                                                            | -0.446 | -1.352 | 0.084 | 0.213 |
| KEGG_APOPTOSIS                                                                                                 | -0.357 | -1.350 | 0.037 | 0.209 |
| KEGG_EPITHELIAL_CELL_SIGNALING_IN_HELICOBACTER_PYLORI_INFECTION                                                | -0.380 | -1.349 | 0.072 | 0.205 |
| REACTOME_NFKB_AND_MAP_KINASES_ACTIVATION_MEDIATED_BY_TLR4_SIGNALING_REPERTOIRE                                 | -0.370 | -1.345 | 0.062 | 0.189 |
| REACTOME_REGULATION_OF_INSULIN_SECRETION                                                                       | -0.357 | -1.336 | 0.044 | 0.199 |
| REACTOME_HOMOLOGOUS_RECOMBINATION_REPAIR_OF_REPLICATION_INDEPENDENT_DOUBLE_STRAND_BREAKS                       | -0.507 | -1.331 | 0.118 | 0.204 |
| REACTOME_SYNTHESIS_OF_PIP3_AT_THE_PLASMA_MEMBRANE                                                              | -0.434 | -1.329 | 0.099 | 0.205 |
| REACTOME_INSULIN_RECEPTOR_SIGNALING_CASCADE                                                                    | -0.360 | -1.328 | 0.067 | 0.205 |
| REACTOME_NCAM_SIGNALING_FOR_NEURITE_OUT_GROWTH                                                                 | -0.371 | -1.326 | 0.068 | 0.207 |
| REACTOME_MITOTIC_G2_M_PHASES                                                                                   | -0.368 | -1.325 | 0.065 | 0.206 |
| KEGG_PROTEIN_EXPORT                                                                                            | -0.454 | -1.325 | 0.106 | 0.233 |
| REACTOME_TGF_BETA_RECEPTOR_SIGNALING_ACTIVATES_SMADS                                                           | -0.453 | -1.324 | 0.122 | 0.206 |
| REACTOME_SYNTHESIS_OF_GLYCOSYLPHOSPHATIDYLINOSITOL_GPI                                                         | -0.498 | -1.324 | 0.142 | 0.205 |
| REACTOME KERATAN_SULFATE KERATIN_METABOLISM                                                                    | -0.444 | -1.321 | 0.110 | 0.207 |
| REACTOME_SIGNAL_AMPLIFICATION                                                                                  | -0.432 | -1.321 | 0.100 | 0.207 |
| REACTOME_REGULATION_OF_KIT_SIGNALING                                                                           | -0.510 | -1.320 | 0.113 | 0.206 |
| KEGG_UBIQUITIN_MEDIATED_PROTEOLYSIS                                                                            | -0.331 | -1.318 | 0.034 | 0.237 |
| REACTOME_SIGNALING_BY_NOTCH1                                                                                   | -0.370 | -1.317 | 0.075 | 0.208 |
| KEGG_STEROID_BIOSYNTHESIS                                                                                      | -0.499 | -1.316 | 0.142 | 0.234 |
| REACTOME_NUCLEAR_SIGNALING_BY_ERBB4                                                                            | -0.403 | -1.315 | 0.128 | 0.210 |
| REACTOME_LYSOSOME_VESICLE_BIOGENESIS                                                                           | -0.460 | -1.314 | 0.135 | 0.210 |
| REACTOME_GLYCOSAMINOGLYCAN_METABOLISM                                                                          | -0.339 | -1.313 | 0.052 | 0.210 |
| REACTOME_HIV_LIFE_CYCLE                                                                                        | -0.343 | -1.313 | 0.033 | 0.209 |
| REACTOME_MRNA_3_END_PROCESSING                                                                                 | -0.415 | -1.311 | 0.110 | 0.211 |
| REACTOME_APC_CDC20_MEDIATED_DEGRADATION_OF_NEK2A                                                               | -0.464 | -1.311 | 0.136 | 0.210 |
| REACTOME_GABA_RECEPTOR_ACTIVATION                                                                              | -0.387 | -1.310 | 0.084 | 0.210 |
| KEGG_CHRONIC_MYELOID_LEUKEMIA                                                                                  | -0.364 | -1.308 | 0.077 | 0.239 |
| REACTOME_SYNTHESIS_AND_INTERCONVERSION_OF_NUCLEOTIDE_DI_AND_TRIPHOSPHATES                                      | -0.482 | -1.306 | 0.130 | 0.214 |
| REACTOME_TRANSCRIPTION                                                                                         | -0.307 | -1.298 | 0.027 | 0.222 |
| REACTOME_LATE_PHASE_OF_HIV_LIFE_CYCLE                                                                          | -0.332 | -1.297 | 0.076 | 0.223 |
| REACTOME_INHIBITION_OF_VOLTAGE_GATED_CA2_CHANNELS_VIA_GBETA_GAMMA_SUBUNITS                                     | -0.443 | -1.286 | 0.144 | 0.236 |
| REACTOME_YAP1_AND_WWTR1_TAZ_STIMULATED_GENE_EXPRESSION                                                         | -0.446 | -1.283 | 0.140 | 0.238 |
| REACTOME_FANCONI_ANEMIA_PATHWAY                                                                                | -0.457 | -1.278 | 0.139 | 0.243 |
| REACTOME_APOPTOTIC_EXECUTION_PHASE                                                                             | -0.374 | -1.278 | 0.088 | 0.242 |
| REACTOME_CLASS_I_MHC_MEDIATED_ANTIGEN_PROCESSING_PRESENTATION                                                  | -0.296 | -1.274 | 0.027 | 0.246 |
| REACTOME_SHC_RELATED_EVENTS                                                                                    | -0.473 | -1.274 | 0.169 | 0.245 |
| REACTOME_ACTIVATION_OF_THE_MRNA_UPON_BINDING_OF_THE_CAP_BINDING_COMPLEX_AND_EIF5_AND_SUBSEQUENT_BINDING_TO_43S | -0.366 | -1.270 | 0.105 | 0.250 |
| REACTOME_ANTIGEN_ACTIVATES_B_CELL_RECEPTOR_LEADING_TO_GENERATION_OF_SECOND_MESSENGERS                          | -0.427 | -1.269 | 0.166 | 0.249 |
| KEGG_ARACHIDONIC_ACID_METABOLISM                                                                               | 0.448  | 1.474  | 0.033 | 0.200 |

|                                                                                                                          |       |       |       |       |
|--------------------------------------------------------------------------------------------------------------------------|-------|-------|-------|-------|
| KEGG_RIG_I_LIKE_RECEPTOR_SIGNALING_PATHWAY                                                                               | 0.441 | 1.481 | 0.045 | 0.204 |
| KEGG_ECM_RECEPTOR_INTERACTION                                                                                            | 0.430 | 1.512 | 0.026 | 0.177 |
| REACTOME_NEGATIVE_REGULATORS_OF_RIG_I_MDA5_SIGNALING                                                                     | 0.540 | 1.535 | 0.045 | 0.225 |
| REACTOME_STEROID_HORMONES                                                                                                | 0.540 | 1.567 | 0.034 | 0.191 |
| REACTOME_CHYLOMICRON_MEDIATED_LIPID_TRANSPORT                                                                            | 0.619 | 1.578 | 0.032 | 0.187 |
| KEGG_DRUG_METABOLISM_OTHER_ENZYMES                                                                                       | 0.519 | 1.579 | 0.027 | 0.118 |
| REACTOME_IMMUNOREGULATORY_INTERACTIONS_BETWEEN_A_LYMPHOID_AND_A_NON_LYMPHOID_CELL                                        | 0.472 | 1.582 | 0.031 | 0.192 |
| REACTOME_HDL_MEDIATED_LIPID_TRANSPORT                                                                                    | 0.658 | 1.613 | 0.036 | 0.161 |
| REACTOME_POST_CHAPERONIN_TUBULIN_FOLDING_PATHWAY                                                                         | 0.660 | 1.619 | 0.037 | 0.163 |
| KEGG_STEROID_HORMONE_BIOSYNTHESIS                                                                                        | 0.518 | 1.619 | 0.016 | 0.093 |
| KEGG_RETINOL_METABOLISM                                                                                                  | 0.493 | 1.620 | 0.018 | 0.100 |
| KEGG_ASCORBATE_AND_ALDARATE_METABOLISM                                                                                   | 0.665 | 1.627 | 0.025 | 0.104 |
| REACTOME_PHASE_II_CONJUGATION                                                                                            | 0.495 | 1.627 | 0.012 | 0.165 |
| KEGG_PENTOSE_AND_GLUCURONATE_INTERCONVERSIONS                                                                            | 0.626 | 1.629 | 0.031 | 0.113 |
| REACTOME_EICOSANOID_LIGAND_BINDING_RECEPTORS                                                                             | 0.658 | 1.632 | 0.031 | 0.170 |
| REACTOME_TRAF6_MEDIATED_IRF7_ACTIVATION                                                                                  | 0.587 | 1.638 | 0.021 | 0.176 |
| REACTOME_BIOLOGICAL_OXIDATIONS                                                                                           | 0.441 | 1.644 | 0.002 | 0.181 |
| REACTOME_SMOOTH_MUSCLE_CONTRACTION                                                                                       | 0.595 | 1.646 | 0.030 | 0.195 |
| REACTOME_PD1_SIGNALING                                                                                                   | 0.643 | 1.672 | 0.012 | 0.177 |
| KEGG_GLUTATHIONE_METABOLISM                                                                                              | 0.529 | 1.682 | 0.009 | 0.082 |
| KEGG_STARCH_AND_SUCROSE_METABOLISM                                                                                       | 0.557 | 1.692 | 0.011 | 0.086 |
| REACTOME_TERMINATION_OF_O_GLYCAN_BIOSYNTHESIS                                                                            | 0.635 | 1.692 | 0.012 | 0.168 |
| REACTOME_RIG_I_MDA5_MEDIATED_INDUCION_OF_IFN_ALPHA_BETA_PATHWAYS                                                         | 0.502 | 1.720 | 0.002 | 0.150 |
| KEGG_AUTOIMMUNE_THYROID_DISEASE                                                                                          | 0.574 | 1.815 | 0.002 | 0.032 |
| KEGG_TYPE_I_DIABETES_MELLITUS                                                                                            | 0.572 | 1.832 | 0.010 | 0.032 |
| REACTOME_STRIATED_MUSCLE_CONTRACTION                                                                                     | 0.662 | 1.873 | 0.002 | 0.036 |
| KEGG_DRUG_METABOLISM_CYTOCHROME_P450                                                                                     | 0.568 | 1.891 | 0.000 | 0.018 |
| KEGG_GRAFT_VERSUS_HOST_DISEASE                                                                                           | 0.629 | 1.939 | 0.000 | 0.016 |
| KEGG_ALLOGRAFT_REJECTION                                                                                                 | 0.639 | 1.957 | 0.000 | 0.018 |
| REACTOME_MUSCLE_CONTRACTION                                                                                              | 0.633 | 1.989 | 0.000 | 0.010 |
| KEGG_METABOLISM_OF_XENOBIOTICS_BY_CYTOCHROME_P450                                                                        | 0.612 | 2.002 | 0.000 | 0.020 |
| REACTOME_CYTOKINE_SIGNALING_IN_IMMUNE_SYSTEM                                                                             | 0.504 | 2.060 | 0.000 | 0.004 |
| REACTOME_REGULATION_OF_INSULIN_LIKE_GROWTH_FACTOR_IGF_ACTIVITY_BY_INSULIN_LIKE_GROWTH_FACTOR_BINDING_PROTEI<br>NS_IGFBPS | 0.839 | 2.095 | 0.000 | 0.003 |
| REACTOME_INTERFERON_GAMMA_SIGNALING                                                                                      | 0.674 | 2.219 | 0.000 | 0.001 |
| REACTOME_INTERFERON_SIGNALING                                                                                            | 0.601 | 2.317 | 0.000 | 0.000 |
| REACTOME_INTERFERON_ALPHA_BETA_SIGNALING                                                                                 | 0.839 | 2.811 | 0.000 | 0.000 |

**Table S1C: Top up and down regulated GSEA REACTOME and KEGG pathways by 5-AZA treatment in H23 cells.** GSEA pathway cut-off of FDR  $\leq 0.250$  was used to delineate pathways with significant enrichment by 5-AZA. ES=Enrichment Score, NES=Normalized Enrichment Score, NOM p-Value= Nominal p Value, FDR q Value= False Discover Rate q Value.

| H1299 5-AZA Enriched Pathways                                    | ES     | NES    | NOM p-val | FDR q-val |
|------------------------------------------------------------------|--------|--------|-----------|-----------|
| KEGG_AMINOACYL_TRNA_BIOSYNTHESIS                                 | -0.641 | -2.148 | 0.000     | 0.000     |
| REACTOME_TRNA_AMINOACYLATION                                     | -0.647 | -2.139 | 0.000     | 0.001     |
| REACTOME_CYTOSOLIC_TRNA_AMINOACYLATION                           | -0.722 | -2.115 | 0.000     | 0.001     |
| REACTOME_GENERIC_TRANSCRIPTION_PATHWAY                           | -0.463 | -2.097 | 0.000     | 0.001     |
| REACTOME_CHOLESTEROL_BIOSYNTHESIS                                | -0.673 | -1.914 | 0.000     | 0.022     |
| REACTOME_AMINO_ACID_TRANSPORT_ACROSS_THE_PLASMA_MEMBRANE         | -0.608 | -1.883 | 0.000     | 0.028     |
| KEGG_MISMATCH_REPAIR                                             | -0.639 | -1.839 | 0.002     | 0.027     |
| REACTOME_ASPARAGINE_N_LINKED_GLYCOSYLATION                       | -0.494 | -1.831 | 0.000     | 0.044     |
| REACTOME_UNFOLDED_PROTEIN_RESPONSE                               | -0.494 | -1.814 | 0.000     | 0.048     |
| REACTOME_INSULIN_SYNTHESIS_AND_PROCESSING                        | -0.629 | -1.806 | 0.002     | 0.046     |
| KEGG_TERPENOID_BACKBONE_BIOSYNTHESIS                             | -0.689 | -1.774 | 0.006     | 0.040     |
| REACTOME_TRANSPORT_TO_THE_GOLGI_AND_SUBSEQUENT_MODIFICATION      | -0.563 | -1.763 | 0.004     | 0.076     |
| REACTOME_SYNTHESIS_OF_PIP5_AT_THE_GOLGI_MEMBRANE                 | -0.639 | -1.722 | 0.008     | 0.114     |
| REACTOME_GABA_SYNTHESIS_RELEASE_REUPTAKE_AND_DEGRADATION         | -0.642 | -1.698 | 0.009     | 0.133     |
| REACTOME_DIABETES_PATHWAYS                                       | -0.416 | -1.663 | 0.000     | 0.171     |
| KEGG_N_GLYCAN_BIOSYNTHESIS                                       | -0.500 | -1.663 | 0.010     | 0.107     |
| REACTOME_FATTY_ACYL_COA_BIOSYNTHESIS                             | -0.606 | -1.647 | 0.018     | 0.187     |
| REACTOME_PI3K_CASCADE                                            | -0.447 | -1.645 | 0.002     | 0.178     |
| REACTOME_NEUROTRANSMITTER_RELEASE_CYCLE                          | -0.516 | -1.626 | 0.011     | 0.197     |
| REACTOME_AMINO_ACID_AND_OLIGOPEPTIDE_SLC_TRANSPORTERS            | -0.473 | -1.618 | 0.010     | 0.198     |
| REACTOME_ACTIVATION_OF_CHAPERONE_GENES_BY_XBP1S                  | -0.477 | -1.613 | 0.008     | 0.196     |
| KEGG_GLYOXYLATE_AND_DICARBOXYLATE_METABOLISM                     | -0.602 | -1.611 | 0.036     | 0.145     |
| REACTOME_CD28_DEPENDENT_PI3K_AKT_SIGNALING                       | -0.564 | -1.609 | 0.030     | 0.193     |
| REACTOME_NETRIN1_SIGNALING                                       | -0.492 | -1.608 | 0.014     | 0.184     |
| KEGG_SELENOAMINO_ACID_METABOLISM                                 | -0.539 | -1.606 | 0.015     | 0.125     |
| REACTOME_TRIGLYCERIDE_BIOSYNTHESIS                               | -0.495 | -1.600 | 0.006     | 0.188     |
| KEGG_SMALL_CELL_LUNG_CANCER                                      | -0.423 | -1.599 | 0.002     | 0.113     |
| REACTOME_TGF_BETA_RECEPTOR_SIGNALING_ACTIVATES_SMADS             | -0.537 | -1.594 | 0.013     | 0.188     |
| REACTOME_PERK_REGULATED_GENE_EXPRESSION                          | -0.541 | -1.584 | 0.018     | 0.196     |
| REACTOME_MITOTIC_PROMETAPHASE                                    | -0.411 | -1.581 | 0.000     | 0.192     |
| REACTOME_INSULIN_RECEPTOR_SIGNALLING_CASCADE                     | -0.416 | -1.572 | 0.006     | 0.198     |
| KEGG_LYSINE_DEGRADATION                                          | -0.467 | -1.569 | 0.002     | 0.127     |
| KEGG_STEROID_BIOSYNTHESIS                                        | -0.587 | -1.559 | 0.021     | 0.124     |
| REACTOME_POST_TRANSLATIONAL_PROTEIN_MODIFICATION                 | -0.368 | -1.552 | 0.000     | 0.224     |
| REACTOME_METAL_ION_SLC_TRANSPORTERS                              | -0.544 | -1.550 | 0.020     | 0.218     |
| REACTOME_FATTY_ACID_TRIACYLGLYCEROL_AND_KETONE_BODY_METABOLISM   | -0.368 | -1.548 | 0.000     | 0.214     |
| REACTOME_AMINO_ACID_SYNTHESIS_AND_INTERCONVERSION_TRANSAMINATION | -0.580 | -1.544 | 0.037     | 0.213     |
| REACTOME_Glutamate_NEUROTRANSMITTER_RELEASE_CYCLE                | -0.597 | -1.533 | 0.030     | 0.226     |
| REACTOME_ACTIVATION_OF_GENES_BY_ATF4                             | -0.522 | -1.530 | 0.030     | 0.224     |
| REACTOME_GLOBAL_GENOMIC_NER_GG_NER                               | -0.489 | -1.520 | 0.028     | 0.235     |
| REACTOME_DEADENYLATION_OF_MRNA                                   | -0.548 | -1.518 | 0.043     | 0.232     |
| REACTOME_TRANSPORT_OF_RIBONUCLEOPROTEINS_INTO_THE_HOST_NUCLEUS   | -0.504 | -1.514 | 0.038     | 0.232     |
| REACTOME_CELL_CYCLE_MITOTIC                                      | -0.336 | -1.514 | 0.000     | 0.226     |
| KEGG_ONE_CARBON_POOL_BY_FOLATE                                   | -0.574 | -1.508 | 0.026     | 0.177     |
| REACTOME_PKB_MEDIATED_EVENTS                                     | -0.502 | -1.505 | 0.031     | 0.234     |

|                                                                                                                          |        |        |       |       |
|--------------------------------------------------------------------------------------------------------------------------|--------|--------|-------|-------|
| REACTOME_DNA_REPLICATION                                                                                                 | -0.356 | -1.502 | 0.002 | 0.233 |
| REACTOME_ACTIVATED_POINT_MUTANTS_OF_FGFR2                                                                                | -0.574 | -1.502 | 0.047 | 0.227 |
| REACTOME_MITOTIC_M_M_G1_PHASES                                                                                           | -0.357 | -1.493 | 0.000 | 0.236 |
| REACTOME_INTERACTIONS_OF_VPR_WITH_HOST_CELLULAR_PROTEINS                                                                 | -0.480 | -1.490 | 0.038 | 0.237 |
| REACTOME_DOUBLE_STRAND_BREAK_REPAIR                                                                                      | -0.515 | -1.488 | 0.051 | 0.234 |
| REACTOME_PI_3K_CASCADE                                                                                                   | -0.423 | -1.484 | 0.033 | 0.234 |
| REACTOME_FGFR_LIGAND_BINDING_AND_ACTIVATION                                                                              | -0.520 | -1.483 | 0.044 | 0.230 |
| KEGG_GLYCEROLIPID_METABOLISM                                                                                             | -0.438 | -1.483 | 0.026 | 0.196 |
| REACTOME_ACTIVATION_OF_THE_PRE_REPLICATIVE_COMPLEX                                                                       | -0.479 | -1.482 | 0.033 | 0.226 |
| KEGG_ERBB_SIGNALING_PATHWAY                                                                                              | -0.391 | -1.473 | 0.008 | 0.192 |
| REACTOME_LOSS_OF_NLP_FROM_MITOTIC_CENTROSOMES                                                                            | -0.421 | -1.471 | 0.028 | 0.239 |
| REACTOME_ACTIVATION_OF_ATR_IN_RESPONSE_TO_REPLICATION_STRESS                                                             | -0.452 | -1.471 | 0.047 | 0.235 |
| KEGG_BUTANOATE_METABOLISM                                                                                                | -0.475 | -1.469 | 0.034 | 0.183 |
| REACTOME_NEGATIVE_REGULATION_OF_FGFR_SIGNALING                                                                           | -0.461 | -1.467 | 0.024 | 0.237 |
| REACTOME_NEP_NS2_INTERACTS_WITH_THE_CELLULAR_EXPORT_MACHINERY                                                            | -0.488 | -1.465 | 0.049 | 0.235 |
| KEGG_PROTEIN_EXPORT                                                                                                      | -0.508 | -1.464 | 0.031 | 0.177 |
| KEGG_PROPANOATE_METABOLISM                                                                                               | -0.468 | -1.461 | 0.034 | 0.170 |
| REACTOME_FORMATION_OF_INCISION_COMPLEX_IN_GG_NER                                                                         | -0.540 | -1.460 | 0.055 | 0.238 |
| REACTOME_BOTULINUM_NEUROTOXICITY                                                                                         | -0.527 | -1.451 | 0.063 | 0.248 |
| KEGG_SPLICEOSOME                                                                                                         | -0.358 | -1.445 | 0.020 | 0.182 |
| KEGG_P53_SIGNALING_PATHWAY                                                                                               | -0.399 | -1.437 | 0.021 | 0.182 |
| KEGG_PYRIMIDINE_METABOLISM                                                                                               | -0.368 | -1.416 | 0.020 | 0.203 |
| KEGG_THYROID_CANCER                                                                                                      | -0.454 | -1.390 | 0.082 | 0.233 |
| KEGG_BETA_ALANINE_METABOLISM                                                                                             | -0.482 | -1.378 | 0.093 | 0.242 |
| REACTOME_TIGHT_JUNCTION_INTERACTIONS                                                                                     | 0.563  | 1.650  | 0.010 | 0.174 |
| REACTOME_TAK1_ACTIVATES_NFKB_BY_PHOSPHORYLATION_AND_ACTIVATION_OF_IKKS_COMPLEX                                           | 0.579  | 1.663  | 0.026 | 0.169 |
| REACTOME_REGULATION_OF_INSULIN_LIKE_GROWTH_FACTOR_IGF_ACTIVITY_BY_INSULIN_LIKE_GROWTH_FACTOR_BINDING_PROTEI<br>NS_IGFBPS | 0.636  | 1.663  | 0.026 | 0.180 |
| REACTOME_LATENT_INFECTION_OF_HOMO_SAPIENS_WITH_MYCOBACTERIUM_TUBERCULOSIS                                                | 0.568  | 1.667  | 0.016 | 0.188 |
| REACTOME_RIP_MEDIATED_NFKB_ACTIVATION_VIA_DAI                                                                            | 0.629  | 1.687  | 0.020 | 0.173 |
| REACTOME_RIG_I_MDA5_MEDIATED_INDUCED_INDUCTION_OF_IFN_ALPHA_BETA_PATHWAYS                                                | 0.481  | 1.699  | 0.002 | 0.167 |
| REACTOME_MEIOTIC_RECOMBINATION                                                                                           | 0.465  | 1.704  | 0.006 | 0.178 |
| REACTOME_INTEGRIN_CELL_SURFACE_INTERACTIONS                                                                              | 0.483  | 1.751  | 0.000 | 0.129 |
| REACTOME_TRAF6_MEDIATED_NFKB_ACTIVATION                                                                                  | 0.628  | 1.756  | 0.006 | 0.138 |
| REACTOME_POST_CHAPERONIN_TUBULIN_FOLDING_PATHWAY                                                                         | 0.700  | 1.782  | 0.004 | 0.123 |
| REACTOME_HDL_MEDIATED_LIPID_TRANSPORT                                                                                    | 0.724  | 1.827  | 0.004 | 0.094 |
| REACTOME_IMMUNOREGULATORY_INTERACTIONS_BETWEEN_A_LYMPHOID_AND_A_NON_LYMPHOID_CELL                                        | 0.537  | 1.850  | 0.000 | 0.089 |
| REACTOME_RNA_POL_I_PROMOTER_OPENING                                                                                      | 0.605  | 2.028  | 0.000 | 0.010 |
| REACTOME_PACKAGING_OF_TELOMERE_ENDS                                                                                      | 0.615  | 2.040  | 0.000 | 0.011 |
| REACTOME_AMYLOIDS                                                                                                        | 0.581  | 2.088  | 0.000 | 0.009 |
| REACTOME_INTERFERON_ALPHA_BETA_SIGNALING                                                                                 | 0.623  | 2.144  | 0.000 | 0.007 |

**Table S1D: Top up and down regulated GSEA REACTOME and KEGG pathways by 5-AZA treatment in H1299 cells.** GSEA pathway cut-off of FDR  $\leq 0.250$  was used to delineate pathways with significant enrichment by 5-AZA. ES=Enrichment Score, NES=Normalized Enrichment Score, NOM p-Value= Nominal p Value, FDR q Value= False Discover Rate q Value.



## **REACTOME DNA Repair Gene List Z Score**

| <b>Gene</b> | <b>H460 5-AZA</b> | <b>H23 5-AZA</b> | <b>H1299 5-AZA</b> | <b>A549 5-AZA</b> |
|-------------|-------------------|------------------|--------------------|-------------------|
| REV1        | -1.496149171      | 0.432746556      | 0.598242704        | 0.465159912       |
| OGG1        | -1.455102828      | 0.174217176      | 0.513971272        | 0.76691438        |
| CCNH        | -1.440099005      | 0.756866979      | 0.096805645        | 0.586426381       |
| GTF2H3      | -1.436385387      | 0.874488566      | 0.196678758        | 0.365218063       |
| TDP1        | -1.42323755       | 0.813936573      | 0.55592553         | 0.053375447       |
| NBN         | -1.413214734      | 0.218113277      | 0.944766057        | 0.250335399       |
| POLR2H      | -1.38565279       | -0.074806784     | 0.667383916        | 0.793075658       |
| RPS27A      | -1.364856644      | -0.095127208     | 0.906543237        | 0.553440616       |
| XRCC4       | -1.36442525       | 0.62036627       | 0.860229011        | -0.116170031      |
| APEX1       | -1.358881319      | 0.810319819      | 0.690431859        | -0.141870359      |
| RFC4        | -1.339044684      | 0.484179197      | 0.978401136        | -0.12353565       |
| FANCL       | -1.327935415      | 0.705619544      | 0.83319724         | -0.210881368      |
| CDK7        | -1.315823996      | 1.098675873      | -0.029160982       | 0.246309105       |
| XPA         | -1.298348689      | 1.028699187      | 0.466271005        | -0.196621503      |
| RAD52       | -1.296887535      | 1.013608146      | -0.212307789       | 0.495587178       |
| USP1        | -1.295963169      | -0.007642825     | 1.136945634        | 0.16666036        |
| RPA3        | -1.247912554      | 1.199308463      | 0.06425382         | -0.01564973       |
| FANCB       | -1.228006258      | 1.221315103      | 0.016904032        | -0.010212877      |
| ERCC8       | -1.212551698      | -0.308498046     | 1.13318502         | 0.387864724       |
| FANCE       | -1.202437507      | -0.305833848     | 0.352160269        | 1.156111086       |
| MDC1        | -1.186685983      | -0.456428524     | 0.951049992        | 0.692064515       |
| ATR         | -1.101213868      | 1.196584808      | -0.466591788       | 0.371220848       |
| MRE11A      | -1.089456669      | 1.31916053       | 0.037656646        | -0.267360507      |
| POLD1       | -1.072120904      | 0.034255104      | 1.328500885        | -0.290635085      |
| FANCC       | -1.047533051      | 0.563991058      | -0.614874252       | 1.098416245       |
| MNAT1       | -1.029019367      | -0.669123887     | 1.009613069        | 0.688530185       |
| LIG4        | -1.01597088       | -0.185016221     | -0.178090793       | 1.379077894       |
| ALKBH3      | -0.981121562      | 0.667027627      | -0.721345634       | 1.035439569       |
| GTF2H1      | -0.97163782       | -0.21739586      | -0.21225402        | 1.4012877         |
| PALB2       | -0.939691445      | 0.100790703      | 1.356185124        | -0.517284382      |
| POLB        | -0.930013091      | -0.691577747     | 1.22432743         | 0.397263408       |
| UBA52       | -0.925618931      | -0.52302974      | 1.364784326        | 0.083864344       |
| MGMT        | -0.916829935      | 1.199688293      | 0.441737369        | -0.724595726      |
| FANCG       | -0.913964393      | 1.224614504      | 0.399984164        | -0.710634275      |
| UBE2T       | -0.871260019      | 0.582788556      | 1.108511519        | -0.820040055      |
| MUTYH       | -0.83848357       | 1.360655658      | 0.132124865        | -0.654296954      |
| BRCA1       | -0.78776264       | -0.018177938     | 1.41646165         | -0.610521072      |
| RAD23B      | -0.761683423      | -0.164292217     | -0.528004357       | 1.453979996       |
| XAB2        | -0.743159391      | -0.356929907     | 1.476116171        | -0.376026873      |
| TCEA1       | -0.663757699      | 1.489451144      | -0.419018155       | -0.406675291      |
| POLE2       | -0.650460534      | -0.310109437     | 1.485119772        | -0.524549801      |
| RFC2        | -0.612320444      | -0.551692431     | 1.488437943        | -0.324425068      |

|          |              |              |              |              |
|----------|--------------|--------------|--------------|--------------|
| NTHL1    | -0.587845402 | 0.621022475  | 1.048357122  | -1.081534194 |
| FANCF    | -0.574695962 | 1.079787759  | -1.08207109  | 0.576979293  |
| POLD3    | -0.57382279  | 0.528761569  | 1.115719376  | -1.070658154 |
| PRKDC    | -0.464975788 | 0.047790231  | -0.952116427 | 1.369301983  |
| MPG      | -0.451592787 | -0.468649695 | 1.497668422  | -0.57742594  |
| POLR2K   | -0.390293346 | -0.376425012 | 1.481550145  | -0.714831787 |
| RFC3     | -0.370782847 | -0.817341856 | 1.456805713  | -0.268681011 |
| XRCC5    | -0.29109715  | 1.296194587  | -1.106714098 | 0.101616661  |
| POLR2E   | -0.244484909 | 0.259552435  | 1.190954065  | -1.206021591 |
| MAD2L2   | -0.174813904 | -0.216300265 | 1.38848817   | -0.997374    |
| C19orf40 | -0.131547947 | 0.347889416  | 1.083103011  | -1.299444481 |
| POLR2I   | -0.061299996 | 0.473790356  | 0.952782615  | -1.365272975 |
| POLE     | -0.048649403 | 0.827430104  | 0.613042432  | -1.391823133 |
| TDG      | -0.018855971 | -1.39226021  | 0.52440688   | 0.886709301  |
| LIG1     | 0.022802935  | 0.965038475  | 0.394973395  | -1.382814805 |
| POLR2J   | 0.037117852  | 0.245438144  | 1.062562406  | -1.345118402 |
| POLD2    | 0.126157552  | -0.120235095 | 1.215564573  | -1.22148703  |
| ATM      | 0.178186168  | 1.151674679  | -1.280409988 | -0.049450859 |
| RPA2     | 0.209345051  | 1.327797295  | -0.692001935 | -0.845140411 |
| RFC5     | 0.223531045  | -0.398389129 | 1.265570014  | -1.09071193  |
| LIG3     | 0.236260472  | -1.283523131 | -0.088075227 | 1.135337886  |
| CCNO     | 0.258631867  | -1.432585881 | 0.896592282  | 0.277361732  |
| XRCC1    | 0.263155393  | 0.873101252  | 0.304483808  | -1.440740453 |
| BRCA2    | 0.267881764  | 0.59847498   | 0.614385482  | -1.480742226 |
| ALKBH2   | 0.313885978  | 0.083922049  | -1.385349771 | 0.987541744  |
| REV3L    | 0.319514923  | 1.1634735    | -1.212987742 | -0.270000681 |
| FANCM    | 0.337220105  | -1.131944857 | 1.200229029  | -0.405504277 |
| POLR2G   | 0.344759209  | 0.446353219  | 0.692786667  | -1.483899095 |
| C17orf70 | 0.35936559   | 0.262892478  | -1.453088176 | 0.830830109  |
| POLR2L   | 0.508183797  | -0.16820854  | 0.982328198  | -1.322303455 |
| RAD50    | 0.542608875  | 0.689888807  | 0.24110283   | -1.473600512 |
| DDB1     | 0.595712272  | 0.754339799  | -1.438170209 | 0.088118138  |
| ERCC1    | 0.624779178  | 0.539142999  | 0.324024118  | -1.487946295 |
| SMUG1    | 0.649026609  | -1.483069558 | 0.291611492  | 0.542431457  |
| ERCC5    | 0.682839136  | 0.45193191   | -1.485436611 | 0.350665564  |
| RAD51    | 0.705497373  | -0.309190219 | 0.880768381  | -1.277075536 |
| H2AFX    | 0.748618197  | -1.048715829 | 0.954640828  | -0.654543196 |
| POLR2C   | 0.768394528  | -0.146440334 | 0.736570412  | -1.358524606 |
| POLR2F   | 0.773902341  | -1.266291652 | 0.827725825  | -0.335336514 |
| POLD4    | 0.885525918  | 0.82800889   | -0.680494382 | -1.033040426 |
| DDB2     | 0.917698049  | 0.307291818  | 0.197783395  | -1.422773263 |
| FANCA    | 0.984272729  | -0.721236214 | 0.727676545  | -0.990713059 |
| POLR2B   | 1.006097642  | -0.895730349 | -0.823084749 | 0.712717456  |
| GTF2H4   | 1.010479066  | -0.701682157 | -1.002601391 | 0.693804482  |
| XPC      | 1.017582089  | 0.695895302  | -0.935013962 | -0.778463429 |

|         |             |              |              |              |
|---------|-------------|--------------|--------------|--------------|
| RPA1    | 1.03362759  | 0.107613293  | 0.225877521  | -1.367118404 |
| ERCC4   | 1.171475497 | 0.441592449  | -1.063095047 | -0.549972899 |
| FEN1    | 1.218688892 | -1.210067326 | 0.154587429  | -0.163208995 |
| ERCC6   | 1.227925037 | -1.103823481 | -0.426792625 | 0.302691069  |
| POLR2D  | 1.256746032 | -0.185416993 | 0.101648981  | -1.17297802  |
| PCNA    | 1.266675021 | -0.960855661 | 0.308353829  | -0.614173189 |
| BRIP1   | 1.280005966 | 0.266128693  | -0.554556397 | -0.991578262 |
| POLH    | 1.285966395 | -1.039287841 | 0.219987141  | -0.466665695 |
| MBD4    | 1.324143561 | 0.069935836  | -0.329599823 | -1.064479574 |
| ZBTB32  | 1.391460618 | 0.034069043  | -0.865423345 | -0.560106315 |
| ERCC3   | 1.419640405 | -0.019775844 | -0.746941008 | -0.652923553 |
| TP53BP1 | 1.424582256 | -0.78465943  | -0.04598663  | -0.593936197 |
| ERCC2   | 1.442633707 | -0.109627804 | -0.762256181 | -0.570749722 |
| XRCC6   | 1.463798622 | -0.681280999 | -0.182712798 | -0.599804825 |
| POLR2A  | 1.481730098 | -0.527955733 | -0.665163428 | -0.288610937 |
| FANCD2  | 1.484043313 | -0.36171501  | -0.697118713 | -0.42520959  |

**Table S2A: Z score table of REACTOME DNA Repair Pathway gene expression. Z score table based on Log2 fold change of gene expression by 5-AZA treatment..**

### Fanconi Anemia Combined Gene List Z Score

| Gene     | H460 5-AZA   | H23 5-AZA    | H1299 5-AZA  | A549 5-AZA   |
|----------|--------------|--------------|--------------|--------------|
| NBN      | -1.413214734 | 0.218113277  | 0.944766057  | 0.250335399  |
| RPS27A   | -1.364856644 | -0.095127208 | 0.906543237  | 0.553440616  |
| RAD1     | -1.347802176 | 0.392423585  | 1.012973753  | -0.057595162 |
| RFC4     | -1.339044684 | 0.484179197  | 0.978401136  | -0.12353565  |
| FANCL    | -1.327935415 | 0.705619544  | 0.83319724   | -0.210881368 |
| USP1     | -1.295963169 | -0.007642825 | 1.136945634  | 0.16666036   |
| FANCB    | -1.228006258 | 1.221315103  | 0.016904032  | -0.010212877 |
| FANCE    | -1.202437507 | -0.305833848 | 0.352160269  | 1.156111086  |
| ATR      | -1.101213868 | 1.196584808  | -0.466591788 | 0.371220848  |
| MRE11A   | -1.089456669 | 1.31916053   | 0.037656646  | -0.267360507 |
| FANCC    | -1.047533051 | 0.563991058  | -0.614874252 | 1.098416245  |
| PALB2    | -0.939691445 | 0.100790703  | 1.356185124  | -0.517284382 |
| UBA52    | -0.925618931 | -0.52302974  | 1.364784326  | 0.083864344  |
| FANCG    | -0.913964393 | 1.224614504  | 0.399984164  | -0.710634275 |
| UBE2T    | -0.871260019 | 0.582788556  | 1.108511519  | -0.820040055 |
| BLM      | -0.864822786 | 0.341642224  | 1.261216008  | -0.738035447 |
| APITD1   | -0.859711026 | -0.249523251 | 1.444402157  | -0.335167879 |
| BRCA1    | -0.78776264  | -0.018177938 | 1.41646165   | -0.610521072 |
| SSPO     | -0.739004691 | 0.199977832  | 1.334550038  | -0.795523179 |
| RFC2     | -0.612320444 | -0.551692431 | 1.488437943  | -0.324425068 |
| FANCF    | -0.574695962 | 1.079787759  | -1.08207109  | 0.576979293  |
| WDR48    | -0.513619469 | 1.115093393  | -1.110637056 | 0.509163132  |
| FAN1     | -0.469815255 | -0.070016055 | -0.876527204 | 1.416358514  |
| RMI1     | -0.469358107 | -0.645438961 | 1.490598744  | -0.375801676 |
| RFC3     | -0.370782847 | -0.817341856 | 1.456805713  | -0.268681011 |
| FANCI    | -0.353012532 | 1.18419286   | 0.335289004  | -1.166469333 |
| HES1     | -0.28620914  | -1.278404343 | 0.955163604  | 0.609449878  |
| TOPBP1   | -0.234199422 | -1.318449991 | 0.749120388  | 0.803529026  |
| C19orf40 | -0.131547947 | 0.347889416  | 1.083103011  | -1.299444481 |
| RAD17    | -0.123204512 | 0.02374947   | 1.270241953  | -1.170786911 |
| TOP3A    | -0.054847413 | 0.06565313   | 1.217835272  | -1.228640988 |
| ATM      | 0.178186168  | 1.151674679  | -1.280409988 | -0.049450859 |
| RPA2     | 0.209345051  | 1.327797295  | -0.692001935 | -0.845140411 |
| RFC5     | 0.223531045  | -0.398389129 | 1.265570014  | -1.09071193  |
| BRCA2    | 0.267881764  | 0.59847498   | 0.614385482  | -1.480742226 |
| FANCM    | 0.337220105  | -1.131944857 | 1.200229029  | -0.405504277 |
| C17orf70 | 0.35936559   | 0.262892478  | -1.453088176 | 0.830830109  |
| RAD50    | 0.542608875  | 0.689888807  | 0.24110283   | -1.473600512 |
| RAD9A    | 0.550626468  | -0.067958463 | 0.893502536  | -1.376170541 |
| H2AFX    | 0.748618197  | -1.048715829 | 0.954640828  | -0.654543196 |
| FANCA    | 0.984272729  | -0.721236214 | 0.727676545  | -0.990713059 |
| RPA1     | 1.03362759   | 0.107613293  | 0.225877521  | -1.367118404 |

|        |             |              |              |              |
|--------|-------------|--------------|--------------|--------------|
| CHEK1  | 1.152507659 | -0.69818544  | 0.508045953  | -0.962368171 |
| XRCC3  | 1.235625267 | 0.033439107  | -1.211961764 | -0.057102611 |
| BRIP1  | 1.280005966 | 0.266128693  | -0.554556397 | -0.991578262 |
| ZBTB32 | 1.391460618 | 0.034069043  | -0.865423345 | -0.560106315 |
| FBXW11 | 1.398393816 | -0.062829227 | -0.3951279   | -0.940436689 |
| HUS1   | 1.430949219 | -0.142171695 | -0.418891768 | -0.869885756 |
| ATRIP  | 1.441872844 | -0.630672762 | -0.093965815 | -0.717234268 |
| FANCD2 | 1.484043313 | -0.36171501  | -0.697118713 | -0.42520959  |

**Table S2B: Z score table of REACTOME Combined Fanconi Anemia Pathway gene expression.** Z score table based on Log2 fold change of gene expression by 5-AZA treatment. See methods for description of combined Fanconi Anemia gene set.
